# Supplementary material
Source: PubMed Central journal article supplement (PMC8783401)
Supplement: mmc1.pdf [file mmc1.pdf]

## **Insights into the specificity for the interaction of the promiscuous SARS-CoV-2 nucleocapsid protein N-terminal domain with deoxyribonucleic acids**

Icaro Putinhon Caruso<sup>1,2,9,\*</sup>, Vitor dos Santos Almeida<sup>3,9</sup>, Mariana Juliani do Amaral<sup>4,5,9</sup>, Guilherme Caldas de Andrade<sup>1,3,9</sup>, Gabriela Rocha de Araújo<sup>1,3,9</sup>, Talita Stelling de Araújo<sup>1,5,9</sup>, Jéssica Moreira de Azevedo<sup>1,5,9</sup>, Glauce Moreno Barbosa<sup>1,3,9</sup>, Leonardo Bartkevihi<sup>1,3,9</sup>, Peter Reis Bezerra<sup>1,3,9</sup>, Katia Maria dos Santos Cabral<sup>1,5,9</sup>, Isabella Otênio de Lourenço<sup>2,9</sup>, Clara L. F. Malizia-Motta<sup>6,9</sup>, Aline de Luna Marques<sup>1,7,9</sup>, Nathane Cunha Mebus-Antunes<sup>1,9</sup>, Thais Cristtina Neves-Martins<sup>1,9</sup>, Jéssica Maróstica de Sá<sup>2,9</sup>, Karoline Sanches<sup>2,9</sup>, Marcos Caique Santana-Silva<sup>1,7,9</sup>, Ariana Azevedo Vasconcelos<sup>1,3,9</sup>, Marcius da Silva Almeida<sup>1,5,9</sup>, Gisele Cardoso de Amorim<sup>1,7,9</sup>, Cristiane Dinis Anobom<sup>3,6,9</sup>, Andrea T. Da Poian<sup>1,9</sup>, Francisco Gomes-Neto<sup>3,8,9</sup>, Anderson S. Pinheiro<sup>6,9</sup>, Fabio C. L. Almeida<sup>1,3,9,\*</sup>

<sup>1</sup>Institute of Medical Biochemistry, Federal University of Rio de Janeiro, Rio de Janeiro, Brazil,

<sup>2</sup>Multiuser Center for Biomolecular Innovation (CMIB), Department of Physics, São Paulo State University (UNESP), São José do Rio Preto, Brazil;

<sup>3</sup>National Center of Nuclear Magnetic Resonance (CNRMN), CENABIO, Federal University of Rio de Janeiro, Rio de Janeiro, Brazil;

<sup>4</sup>Faculty of Pharmacy, Federal University of Rio de Janeiro, Rio de Janeiro, Brazil;

<sup>5</sup>Protein Advanced Biochemistry (PAB), CENABIO, Federal University of Rio de Janeiro, Rio de Janeiro, Brazil;

<sup>6</sup>Department of Biochemistry, Institute of Chemistry, Federal University of Rio de Janeiro, Rio de Janeiro, Brazil;

<sup>7</sup>Multidisciplinary Center for Research in Biology (NUMPEX), Campus Duque de Caxias Federal University of Rio de Janeiro, Duque de Caxias, Brazil.

<sup>8</sup>Laboratory of Toxinology, Oswaldo Cruz Foundation (FIOCRUZ), Rio de Janeiro, Brazil

<sup>9</sup>Rio BioNMR Network, Rio de Janeiro, Brazil

**\*To whom correspondence should be addressed:**

e-mail: falmeida@bioqmed.ufrj.br

e-mail: icaro.caruso@unesp.br

## SUPPLEMENTARY MATERIAL

|           |                                                                                        | <b>NLS1</b>                                                       |
|-----------|----------------------------------------------------------------------------------------|-------------------------------------------------------------------|
| OC43      | MSFTPGKQSSSRASSGNRS-VNGILKWADQSDQFRNVQTRGRRAQPKQTATSQQPSGGNV                           |                                                                   |
| HKU1      | MSYTPGHYAGSRSSSGNRSGLKKTSWADQSERNYQTFNRGRKTQPKFTVSTQFPQ--GNT                           |                                                                   |
| SARS-CoV2 | -----MSDNGPQ-NQRNAPRITFGGSDSTGSDNQNNGERSG----AR <b>SKORRPO</b> GLP                     |                                                                   |
| SARS      | -----MSDNGPQSNQRSAPRITFGGPTDSTDNQNGGRNG----AR <b>PKORRPO</b> GLP                       |                                                                   |
| MERS      | -----MASPAAPRAVSFADNNDITNTNLSRGRG-----RNPKPRAAP                                        |                                                                   |
|           |                                                                                        | . . . . . : . * : .                                               |
| OC43      | VPYYSWFSGITQFQKGEFEFAEGQGVPPIAPGVPATEAKGYWYRHNRRSFKTADGNQRQL                           |                                                                   |
| HKU1      | IPHYSWFSGITQFQKGRDFKFDGQGVPIAFGVPPSEAKGYWYRHSRRSFKTADGQQKQL                            |                                                                   |
| SARS-CoV2 | NNTASWFTALTQHGK-EDLKFPRGQGVPIINTNSPDDQIGYRRATRR-IRGGDGKMKDL                            |                                                                   |
| SARS      | NNTASWFTALTQHGK-EELRFPRGQGVPIINTNSPDDQIGYRRATRR-VRGGDGKMKEL                            |                                                                   |
| MERS      | NNTVSWYTGLTQHGK-VPLTFPPGQVPLNANSTPAQNAGYWRQDRK-INTGNG- <b>IKQL</b>                     |                                                                   |
|           |                                                                                        | **:::*. * : * . *****: . . : ** : * * : . . . : * : *             |
| OC43      | LPRWYFYLLGTGPHAKDQYGTDIDGVYVVASNQADVNTPADIVDRDPSSDEAIPTRFPPG                           |                                                                   |
| HKU1      | LPRWYFYLLGTGPHYANASYGESLEGVFWVANHQADTSTPDSVSSRDPTTQEAIPTRFPPG                          |                                                                   |
| SARS-CoV2 | SPRWYFYLLGTGPEAGLPGYANKDGIWVATEGALNTPKDHIGTRNPANNAIIVLQLPQG                            |                                                                   |
| SARS      | SPRWYFYLLGTGPEASLPYANKGIVVWATEGALNTPKDHIGTRNPANNAIIVLQLPQG                             |                                                                   |
| MERS      | APRWYFYLLGTGPEAALPFRVAVKDGIVVWHEDGATDAP-STFGTRNPNNDSAIIVTQFAPG                         |                                                                   |
|           |                                                                                        | ***** * * * * : : * : * . * . . * : * : * . . . *                 |
| OC43      | TVLPQGYI <b>EGS</b> -GRSAPNSRSTSRSTSSRASSAGSRSRANSNGNRTPTSGVTPDMADQIAS                 |                                                                   |
| HKU1      | TILPQGYI <b>EGS</b> -GRSASNSRPGSRSQSRGPNTRSLSRNSNFRHSDSIVKPDMADEIAN                    |                                                                   |
| SARS-CoV2 | TTLPKGFYA <b>EGSRGGSQASSR</b> SSSRSRNSRNSTPGSSRGTS <b>P---</b> ARMAGNGGDAAL <b>LAL</b> |                                                                   |
| SARS      | TTLPKGFYA <b>EGSRGGSQASSR</b> SSSRSRGNSRNSTPGSSRGN <b>S---</b> ARMASGGGETAL <b>LAL</b> |                                                                   |
| MERS      | TKLPKNFH <b>IEGTGGNSQSSSRASSLSRNSR</b> SSSQGSRSNGNSTRGTSPGPSGIGAVGGDL                  |                                                                   |
|           |                                                                                        | * * * : : * : * * . * . * . : . . . : * . . .                     |
|           |                                                                                        | <b>NES</b> <span style="margin-left: 100px;"><b>NLS2</b></span>   |
| OC43      | LVLAKLGKDATKPKQVTKHT-----AKEVRQKILNKPRQKRSPNKQCTVQQCFGKGRP--                           |                                                                   |
| HKU1      | LVLAKLGKDS-KPQQVTKQN-----AKEIRHKILTKPRQKRTPNKHCNVQQCFGKGRP--                           |                                                                   |
| SARS-CoV2 | <b>LLLDRLNQL</b> ESKMSGKQQQQGQTVTKKSAEAS <b>KKPRQKRTA</b> TKAYNVTQAFGRRGPEQ            |                                                                   |
| SARS      | <b>LLLDRLNQL</b> ESKMSGKQQQQGQTVTKKSAEAS <b>KKPRQKRTA</b> TKQYNVTQAFGRRGPEQ            |                                                                   |
| MERS      | LYLDLLNRLQALESGKVKQSQPKVITKKDAAAANKMHRKRTSTKSFNMVQAFGLRGP                              |                                                                   |
|           |                                                                                        | * * * . : . : : * : : * : * * : * : * . * * * * * . : * . * * * * |
| OC43      | -NQNFGGEMLKLGTSDPQFPILAEALPTAGAFFFGSRLELAKVQNLSGNPDEPQKDVEE                            |                                                                   |
| HKU1      | -SQNFNAEMLKLGTNDPQFPILAEALPTAGAFFFGSKLELVKRE---SEADSPVKDVEE                            |                                                                   |
| SARS-CoV2 | TQGNFGDQELIRQGTDYKHWPQIAQFAPSASAFFGMSRIGMEVTPSG-----TW                                 |                                                                   |
| SARS      | TQGNFGDQDLIRQGTDYKHWPQIAQFAPSASAFFGMSRIGMEVTPSG-----TW                                 |                                                                   |
| MERS      | LQGNFGDLQNLKLTEDPRWPQIAELAPTASAFMGMSQFKLTHQNNDDHGNP-----VYF                            |                                                                   |
|           |                                                                                        | . * * . : : * . : * : * : * : * : * : * : * : *                   |
| OC43      | LRYNGAIRFDSTLSGFETIMKVLSENLNAYQ---QDGMNMSPKPQRQRGHKNGQGEN                              |                                                                   |
| HKU1      | LRYSGSIRFDSTLPGFETIMKVLKENLDAVNSNQNTVSGLSLSPKQRKRQVQSPQLFD                             |                                                                   |
| SARS-CoV2 | LTYTGAIKLDDKDPNFKDQVILLNKHIDAYK-----TFPPTE <b>PKK--DKKKKAD</b>                         |                                                                   |
| SARS      | LTYHGAIKLDDKDPQFKDNVILLNKHIDAYK-----TFPPTE <b>PKK--DKKKKTD</b>                         |                                                                   |
| MERS      | LRYSGAIKLDPKPNPNYKWLLELLEQNIDAYK-----TFPKKEKKQKAPKEESTD                                |                                                                   |
|           |                                                                                        | * * * : * * . . : : * : * : * : * : * : * : * : * : *             |
|           |                                                                                        | <b>NLS3</b>                                                       |
| OC43      | NISVAVPKSRVQQNKSIELTAEDI SLLKKMDEPYTEDTSEI---                                          |                                                                   |
| HKU1      | SLNLSADTQHISN----DFTPEDHSLLATLDDPYVEDSVA----                                           |                                                                   |
| SARS-CoV2 | <b>ETQALPQRQKKQ</b> QTVTLLPAADLDDFSKQLQQSMSSADSTQA--                                   |                                                                   |
| SARS      | <b>EAQPLPQRQKKQ</b> PTVTLLPAADMDDFSRQLQNSMSGASADSTQA                                   |                                                                   |
| MERS      | QMSEPPKEQRVQGSITQRTRTRPSVQPGPMIDVNTD-----                                              |                                                                   |
|           |                                                                                        | . . . . . : . . . . . : . . . . .                                 |

**Figure S1.** Sequence alignment of the N protein from SARS-CoV-2, SARS-CoV, CoV-MERS, CoV-HKU1, and CoV-OC43 performed using the webserver ClustalW [2]. Sequence homology between hCoV N protein is denoted by asterisk (\*), colon (:), and period (.). The

asterisk indicates fully conserved residue, colon represents conservation between groups of strongly similar properties, and period indicates conservation between groups of weakly similar properties. The residue sequences of the SARS-CoV-2 N-NTD and its SR-motif are denoted in red and blue, respectively. The nuclear localization signals are indicated by NLS1, NLS2, and NLS3 with the residue sequence for SARS-CoV-2 and SARS-CoV highlighted in cyan and gray, respectively. The nuclear export signal is indicated by NES with the residue sequence for SARS-CoV-2 and SARS-CoV highlighted in magenta and gray, respectively. The residue E174 is denoted in green.

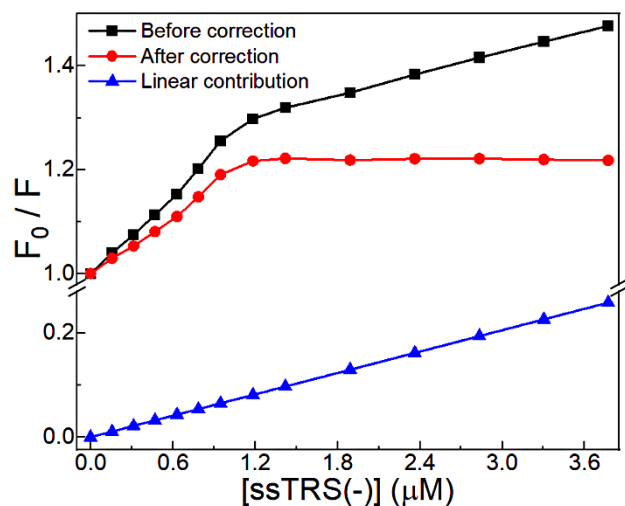

**Figure S2.** Removal of the upward linear contribution (blue triangle) from the fluorescence titration curves (black square) resulting in the corrected binding isotherm (red circle).

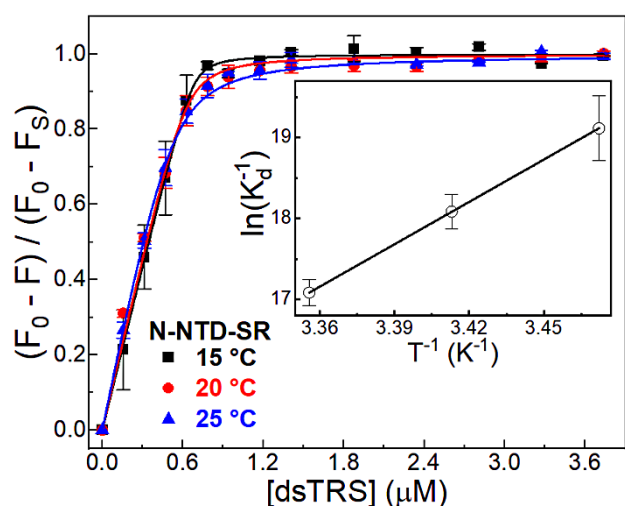

**Figure S3.** Fluorescence quenching changes of N-NTD as a function of the dsTRS concentration in 20 mM Bis-Tris buffer (pH 6.5) at 15, 20, and 25 °C. Each point on the binding isotherm represents the average and standard error calculated from duplicate measurements. The continuous lines denote the theoretical curves globally adjusted to the

experimental data. The inset shows the van't Hoff plot determined the enthalpy change value for the N-NTD/ssTRS(-) complex.

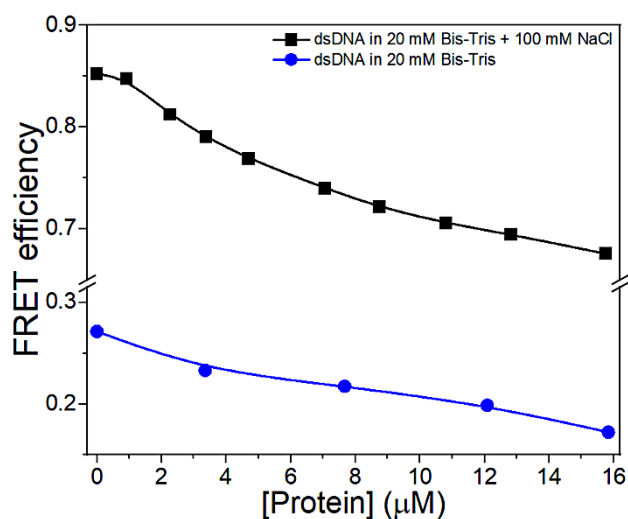

**Figure S4.** FRET efficiency as a function of the total concentration of N-NTD-SR in 20 mM Bis-Tris (pH 6.5) containing 0 mM (blue circles) and 100 mM NaCl (black squares) for dsDNA TRS.

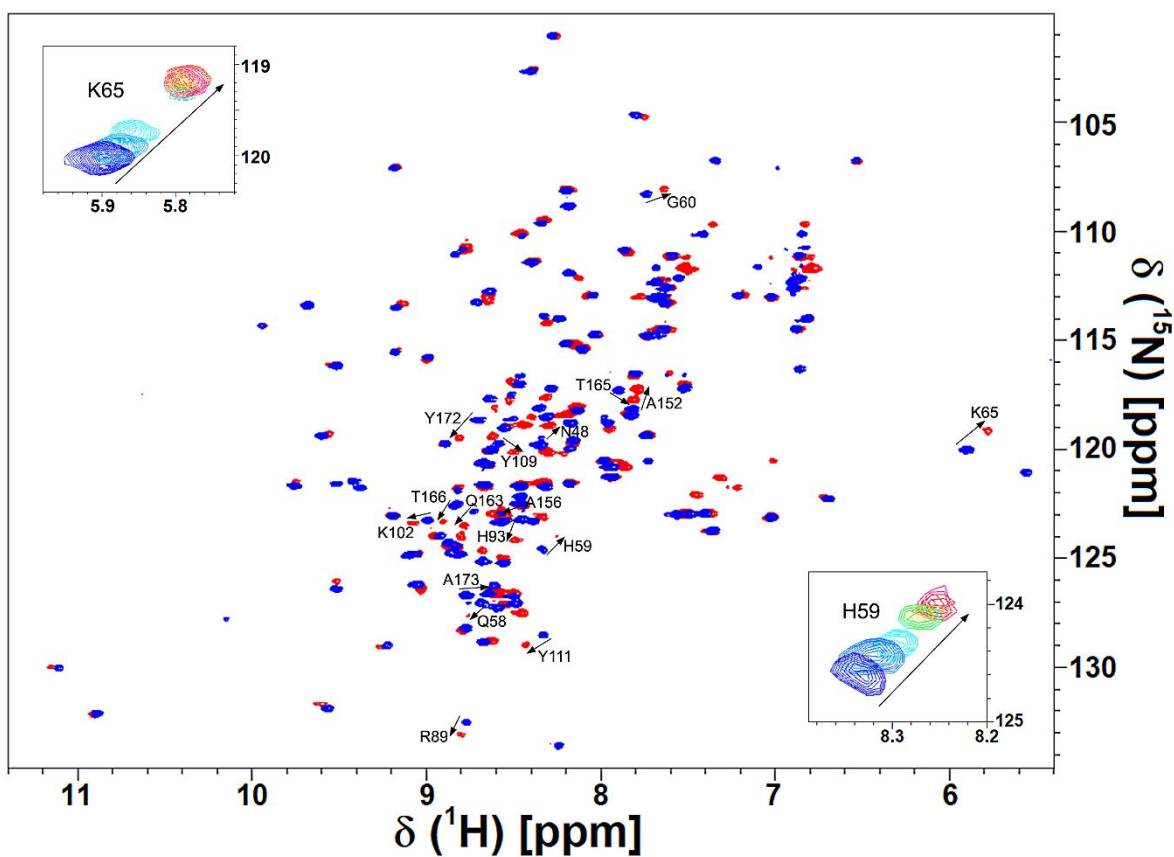

**Figure S5.** Two-dimensional  $[^1\text{H}-^{15}\text{N}]$  HSQC spectra of the free (blue) and ssTRS(-)-bound (red)  $[\text{U}-^{15}\text{N}]$ N-NTD collected by using an NMR spectrometer operating at  $^1\text{H}$  frequency of

600.033 MHz at 20°C. The arrows indicate the residues that presented a chemical shift perturbation (CSP) upon DNA binding higher than  $\Delta\delta_{ave} + SD$ . (Insets) Titration effect on the behavior of the exchange regime for H59 and K65 upon ssTRS(-) binding. The spectra were recorded at a protein concentration of 70  $\mu\text{M}$  (dark blue) and at an DNA concentration of 9.8  $\mu\text{M}$  (light blue), 23.8  $\mu\text{M}$  (cyan), 53.9  $\mu\text{M}$  (green), 70  $\mu\text{M}$  (yellow), 109.9  $\mu\text{M}$  (orange), 174.4  $\mu\text{M}$  (pink), and 209.3  $\mu\text{M}$  (red).

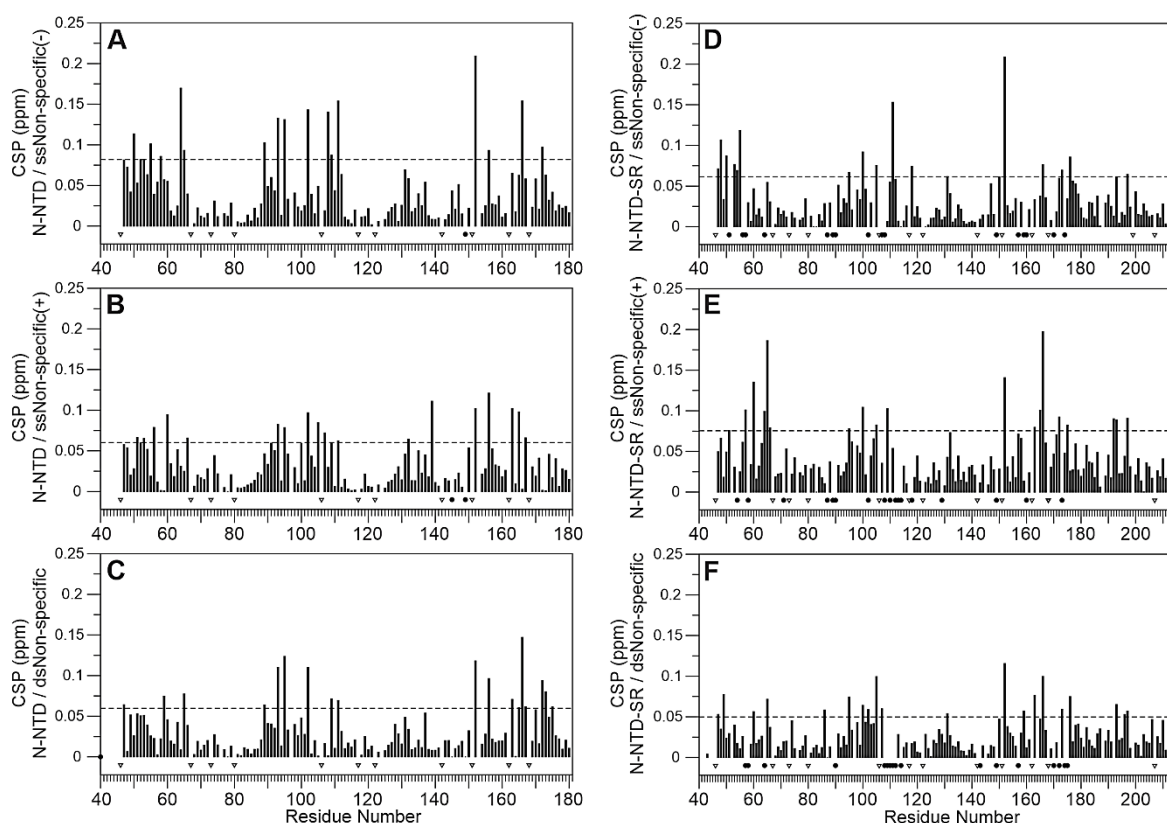

**Figure S6.** Chemical Shift Perturbation (CSP) of N-NTD and N-NTD-SR protein upon interaction with non-specific (NS) DNA. Chemical Shift Perturbation (CSP) of N-NTD (A, B, and C) and N-NTD-SR (D, E, and F) upon interaction with ssNS(-) (A, D), ssNS(+) (B, E), and dsNS (C, F). A chemical shift perturbation higher than the average CSP value ( $\Delta\delta_{ave}$ ) plus one standard deviation (SD) (dotted line) was considered statistically significant and used as experimental constraints in subsequent docking calculations. The proline residues (46, 67, 73, 80, 106, 117, 122, 142, 151, 162, 168, 199 and, 207) are indicated by triangle-down. Resonances signals broadened beyond detection upon NS titration are represented by the filled black circles.

| protein-DNA complex/sequence   | A  | N  | N  | T  | A  | S  | W  | F  | T  | A  | L  | T  | Q  | H  | G  | K  | L  | K  | F  | G  | Y | Y  | R  | A  | T  | R  | R   | I   | R   | G   | K   | K   | D   | L   | S   | R   | W   | Y   | F   | Y   |     |     |
|--------------------------------|----|----|----|----|----|----|----|----|----|----|----|----|----|----|----|----|----|----|----|----|---|----|----|----|----|----|-----|-----|-----|-----|-----|-----|-----|-----|-----|-----|-----|-----|-----|-----|-----|-----|
| >N-NTD+ssTRS (-)               |    |    | 48 |    |    |    | 52 |    |    |    |    |    | 57 | 58 | 59 | 60 |    | 64 | 65 |    |   |    | 89 |    |    | 93 |     |     |     |     | 102 |     |     |     |     |     | 108 | 109 | 110 | 111 |     |     |
| >N-NTD+ssTRS (+)               |    |    |    |    |    |    | 51 | 53 | 54 | 55 | 56 | 57 | 58 | 59 |    | 61 | 64 | 65 |    |    |   |    |    |    |    | 92 | 93  | 94  |     |     |     |     |     |     |     |     |     |     | 108 |     | 110 | 111 |
| >N-NTD+dsTRS                   | 42 |    |    |    |    |    | 51 |    |    |    |    |    | 56 | 57 | 59 |    | 64 | 65 |    |    |   |    |    |    | 91 | 92 |     |     | 95  |     |     |     |     |     |     |     |     | 108 |     |     |     |     |
| consensus                      |    |    |    |    |    |    | :  |    |    |    |    | :  | *  | :  | *  |    | *  | *  |    |    |   |    |    |    | :  | :  |     |     |     |     |     |     |     |     |     |     |     | *   |     | :   | :   |     |
| >N-NTD+10mer-ssTRS (+) (RNA) § |    |    |    |    |    |    |    |    |    |    |    |    | 56 |    |    | 60 | 61 |    | 65 | 66 |   |    | 90 |    | 93 | 94 | 95  |     | 100 | 102 | 103 | 104 |     |     |     |     |     |     |     |     |     |     |
| >N-NTD+7mer-ssTRS (+) (RNA) §  |    |    |    |    |    |    |    |    |    |    |    |    | 56 | 57 |    | 60 |    |    | 65 | 66 |   |    | 90 |    | 93 | 94 | 95  |     | 102 | 103 | 104 |     |     |     |     |     |     |     |     |     |     |     |
| >N-NTD+7mer-dsNS (RNA) §       |    |    |    |    |    |    | 50 |    |    |    |    |    | 56 | 57 |    |    |    | 65 | 66 |    |   |    |    |    | 92 | 93 | 94  |     | 96  |     |     | 103 |     | 105 | 107 | 108 |     |     |     |     |     |     |
| >N-NTD+ssNS (-)                | 47 |    |    | 50 |    | 52 | 53 |    | 55 |    |    | 58 |    |    |    | 64 | 65 |    |    |    |   | 89 |    |    | 93 |    | 95  |     |     | 102 |     |     |     |     |     |     | 108 | 109 |     | 111 |     |     |
| >N-NTD+ssNS (+)                |    |    |    |    |    | 51 | 52 | 53 |    |    | 56 |    |    |    | 60 |    |    | 66 |    |    |   |    |    | 91 |    | 93 |     | 95  |     | 100 | 102 |     |     |     |     | 105 | 107 |     | 109 | 111 |     |     |
| >N-NTD+dsNS                    | 47 |    |    |    |    |    |    |    |    |    |    |    | 59 |    |    |    | 65 |    |    |    |   |    | 89 |    |    | 93 |     | 95  |     |     | 102 |     |     |     |     |     |     | 109 | 111 |     |     |     |
| consensus                      | :  |    |    |    | :  | :  |    |    |    |    |    |    |    |    | :  |    | :  |    |    |    |   | :  |    |    | *  | *  |     | *   |     |     |     |     |     |     |     | *   |     | *   | *   |     |     |     |
| >N-NTD-SR+TRS (-)              |    |    | 48 |    | 51 |    |    | 54 |    |    |    |    |    |    |    | 64 | 65 |    |    |    |   | 89 | 90 | 91 |    | 93 |     |     | 100 | 102 |     |     |     |     |     |     | 108 |     |     | 111 |     |     |
| >N-NTD-SR+TRS (+)              |    |    |    |    |    |    | 53 | 54 |    | 56 | 57 |    |    |    |    |    | 65 |    |    |    |   |    | 89 |    | 92 |    |     | 95  | 100 | 102 |     |     |     |     | 105 |     |     | 109 | 111 |     |     |     |
| >N-NTD-SR+dsTRS                |    |    |    |    |    |    |    |    |    |    |    |    |    |    | 60 | 64 | 65 |    |    |    |   |    | 89 | 90 |    |    | 95  | 100 | 102 |     |     |     |     | 105 |     | 108 | 109 | 110 | 111 |     |     |     |
| consensus                      |    |    |    |    |    |    | :  |    |    |    |    |    |    |    | :  | *  | *  |    |    |    |   | *  | :  |    | :  |    | *   | *   |     | :   |     |     |     | :   | :   | :   | :   | :   | *   | *   |     |     |
| >N-NTD-SR+ssNS (-)             | 47 | 48 |    | 50 | 51 |    | 53 | 54 | 55 | 56 | 57 |    |    |    |    | 64 |    |    |    |    |   | 87 | 89 | 90 |    |    | 95  | 100 | 102 |     |     |     |     | 105 | 107 | 108 |     |     | 111 |     |     |     |
| >N-NTD-SR+ssNS (+)             |    |    |    |    |    | 51 |    | 54 |    |    | 57 | 58 |    |    | 60 | 64 | 65 | 66 | 71 |    |   | 87 | 89 | 90 |    |    | 95  | 100 | 102 |     |     |     |     | 105 |     | 108 | 109 | 110 |     |     |     |     |
| >N-NTD-SR+dsNS                 | 47 |    | 49 |    |    |    |    |    |    |    | 57 | 58 |    |    | 60 | 64 | 65 |    |    | 86 |   |    | 90 |    |    | 95 | 100 | 102 |     |     |     |     | 105 | 107 | 108 | 109 | 110 | 111 |     |     |     |     |
| consensus                      | :  |    | :  |    | :  |    |    |    |    | *  | :  |    |    |    | :  | *  | :  |    |    |    | : | :  | *  |    | *  | *  | *   | *   | *   | *   | *   | *   | *   | *   | :   | *   | :   | *   | :   | :   | :   |     |

  

| protein-DNA complex/sequence   | Y   | L | G   | E | G | I | W | A | L | K | H | R | N | A   | A | I | L | Q | Q | T | T | L | G | Y | A | E | G | S | R | N | S | N | S |   |   |   |   |   |   |   |   |   |  |  |
|--------------------------------|-----|---|-----|---|---|---|---|---|---|---|---|---|---|-----|---|---|---|---|---|---|---|---|---|---|---|---|---|---|---|---|---|---|---|---|---|---|---|---|---|---|---|---|--|--|
| >N-NTD+ssTRS (-)               |     |   |     |   |   |   |   |   |   |   |   |   |   |     |   |   |   |   |   |   |   |   |   |   |   |   |   |   |   |   |   |   |   |   |   |   |   |   |   |   |   |   |  |  |
| >N-NTD+ssTRS (+)               |     |   | 113 |   |   |   |   |   |   |   |   |   |   |     |   |   |   |   |   |   |   |   |   |   |   |   |   |   |   |   |   |   |   |   |   |   |   |   |   |   |   |   |  |  |
| >N-NTD+dsTRS                   | 112 |   |     |   |   |   |   |   |   |   |   |   |   | 134 |   |   |   |   |   |   |   |   |   |   |   |   |   |   |   |   |   |   |   |   |   |   |   |   |   |   |   |   |  |  |
| consensus                      |     |   |     |   |   |   |   |   |   |   |   |   |   |     |   |   |   |   |   |   |   |   |   |   |   |   |   |   |   |   |   |   |   |   |   |   |   |   |   |   |   |   |  |  |
| >N-NTD+10mer-ssTRS (+) (RNA) § |     |   |     |   |   |   |   |   |   |   |   |   |   |     |   |   |   |   |   |   |   |   |   |   |   |   |   |   |   |   |   |   |   |   |   |   |   |   |   |   |   |   |  |  |
| >N-NTD+7mer-ssTRS (+) (RNA) §  |     |   |     |   |   |   |   |   |   |   |   |   |   |     |   |   |   |   |   |   |   |   |   |   |   |   |   |   |   |   |   |   |   |   |   |   |   |   |   |   |   |   |  |  |
| >N-NTD+7mer-dsNS (RNA) §       |     |   |     |   |   |   |   |   |   |   |   |   |   |     |   |   |   |   |   |   |   |   |   |   |   |   |   |   |   |   |   |   |   |   |   |   |   |   |   |   |   |   |  |  |
| >N-NTD+ssNS (-)                |     |   |     |   |   |   |   |   |   |   |   |   |   |     |   |   |   |   |   |   |   |   |   |   |   |   |   |   |   |   |   |   |   |   |   |   |   |   |   |   |   |   |  |  |
| >N-NTD+ssNS (+)                |     |   |     |   |   |   |   |   |   |   |   |   |   |     |   |   |   |   |   |   |   |   |   |   |   |   |   |   |   |   |   |   |   |   |   |   |   |   |   |   |   |   |  |  |
| >N-NTD+dsNS                    |     |   |     |   |   |   |   |   |   |   |   |   |   |     |   |   |   |   |   |   |   |   |   |   |   |   |   |   |   |   |   |   |   |   |   |   |   |   |   |   |   |   |  |  |
| consensus                      |     |   |     |   |   |   |   |   |   |   |   |   |   |     |   |   |   |   |   |   |   |   |   |   |   |   |   |   |   |   |   |   |   |   |   |   |   |   |   |   |   |   |  |  |
| >N-NTD-SR+TRS (-)              |     |   |     |   |   |   |   |   |   |   |   |   |   |     |   |   |   |   |   |   |   |   |   |   |   |   |   |   |   |   |   |   |   |   |   |   |   |   |   |   |   |   |  |  |
| >N-NTD-SR+TRS (+)              |     |   |     |   |   |   |   |   |   |   |   |   |   |     |   |   |   |   |   |   |   |   |   |   |   |   |   |   |   |   |   |   |   |   |   |   |   |   |   |   |   |   |  |  |
| >N-NTD-SR+dsTRS                |     |   |     |   |   |   |   |   |   |   |   |   |   |     |   |   |   |   |   |   |   |   |   |   |   |   |   |   |   |   |   |   |   |   |   |   |   |   |   |   |   |   |  |  |
| consensus                      |     |   |     |   |   |   |   |   |   |   |   |   |   |     |   |   |   |   |   |   |   |   |   |   |   |   |   |   |   |   |   |   |   |   |   |   |   |   |   |   |   |   |  |  |
| >N-NTD-SR+ssNS (-)             |     |   |     |   |   |   |   |   |   |   |   |   |   |     |   |   |   |   |   |   |   |   |   |   |   |   |   |   |   |   |   |   |   |   |   |   |   |   |   |   |   |   |  |  |
| >N-NTD-SR+ssNS (+)             |     |   |     |   |   |   |   |   |   |   |   |   |   |     |   |   |   |   |   |   |   |   |   |   |   |   |   |   |   |   |   |   |   |   |   |   |   |   |   |   |   |   |  |  |
| >N-NTD-SR+dsNS                 |     |   |     |   |   |   |   |   |   |   |   |   |   |     |   |   |   |   |   |   |   |   |   |   |   |   |   |   |   |   |   |   |   |   |   |   |   |   |   |   |   |   |  |  |
| consensus                      | *   |   | :   | : | : |   |   |   |   |   |   | * | * | :   | : | : | : | : | * |   |   |   |   | : | : | * | : | : | : | : | : | : | : | * | * | * | * | * | * | * | * | * |  |  |

**Figure S7.** Alignment of the consensus residues with CSP values higher than  $\Delta\delta_{ave} + SD$  for the interaction of N-NTD and N-NTD-SR with ssDNAs and dsDNAs identified in the NMR titration experiments. The asterisk (\*) and colon (: ) indicate fully (three) and partial (two) consensus residues, respectively. Residue with resonance signal broadened beyond detection upon DNA binding is colored in red. The symbol § denotes the residues of N-NTD reported by Dinesh and cols. (2020) for the interaction with 7-nucleotide and 10-nucleotide ssTRS(+) RNA (5'-CUAAACG-3', 5'-UCUCUAAACG-3'), and 7-nucleotide non-specific RNA duplex (5'-CACUGAC-3' and 5'-GUCAGUG-3') [1]. Numbers represent the amino acid position in the protein sequence.

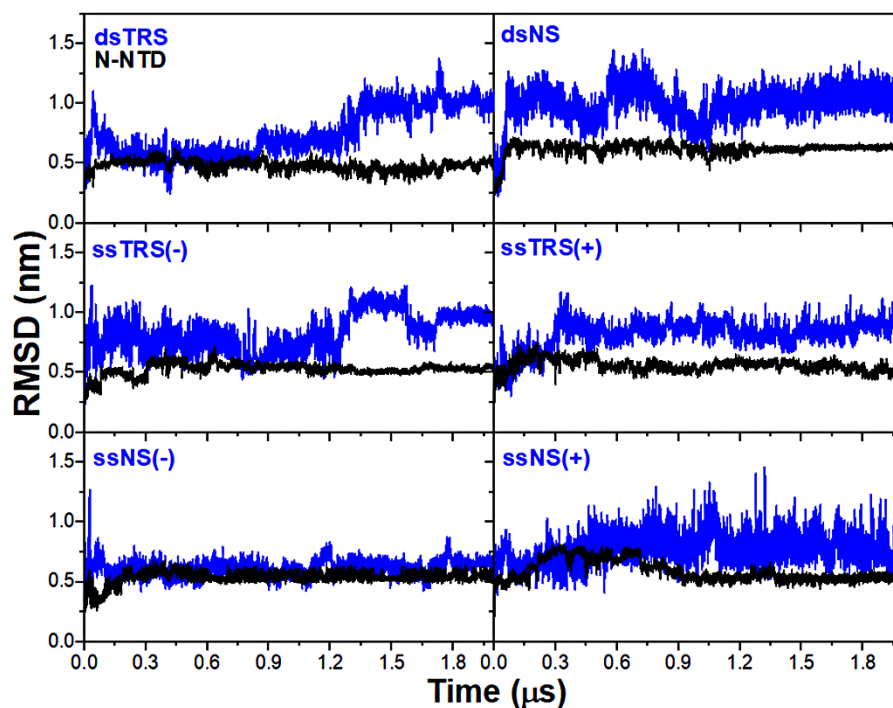

**Figure S8.** RMSD values of the backbone atoms of N-NTD (black) and protein-bound DNA (blue) along the 2  $\mu$ s MD simulations.

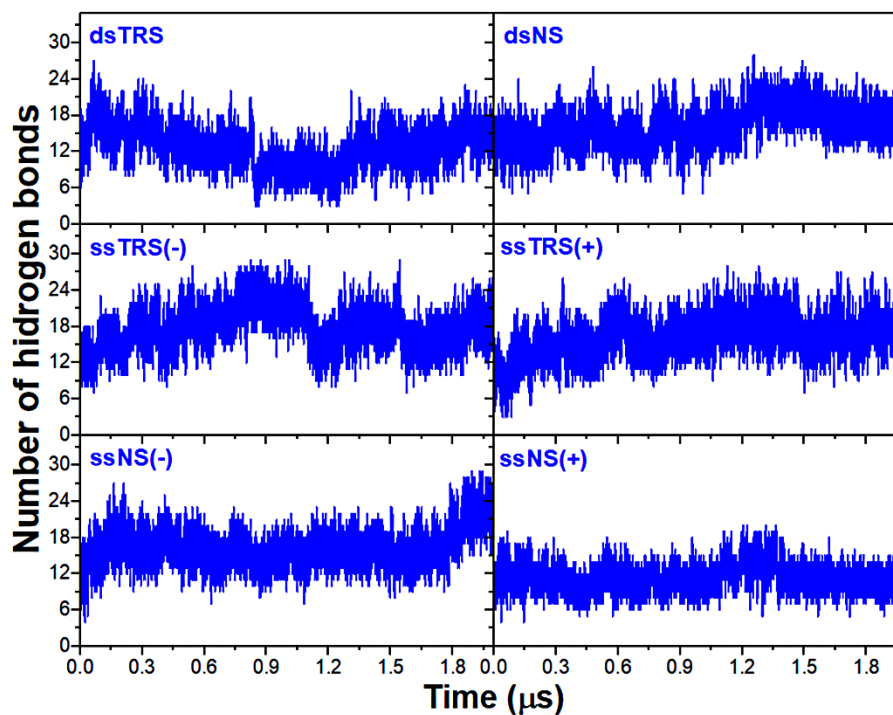

**Figure S9.** Number of protein-DNA hydrogen bonds formed between N-NTD and DNAs along the 2  $\mu$ s MD simulations.

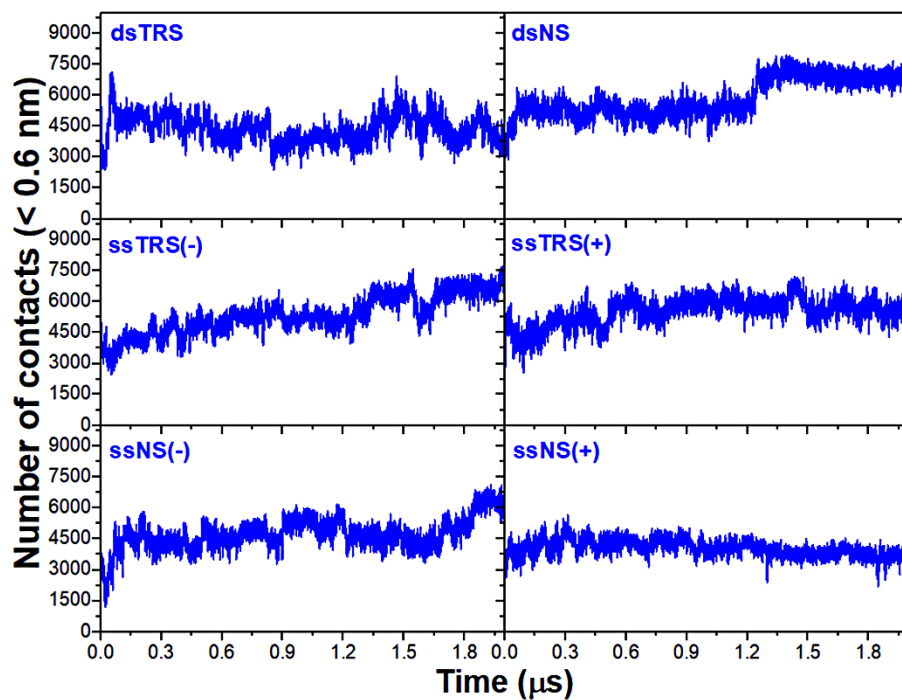

**Figure S10.** Number of contacts < 0.6 nm between the N-NTD and DNA atoms for the along the 2 μs MD simulations.



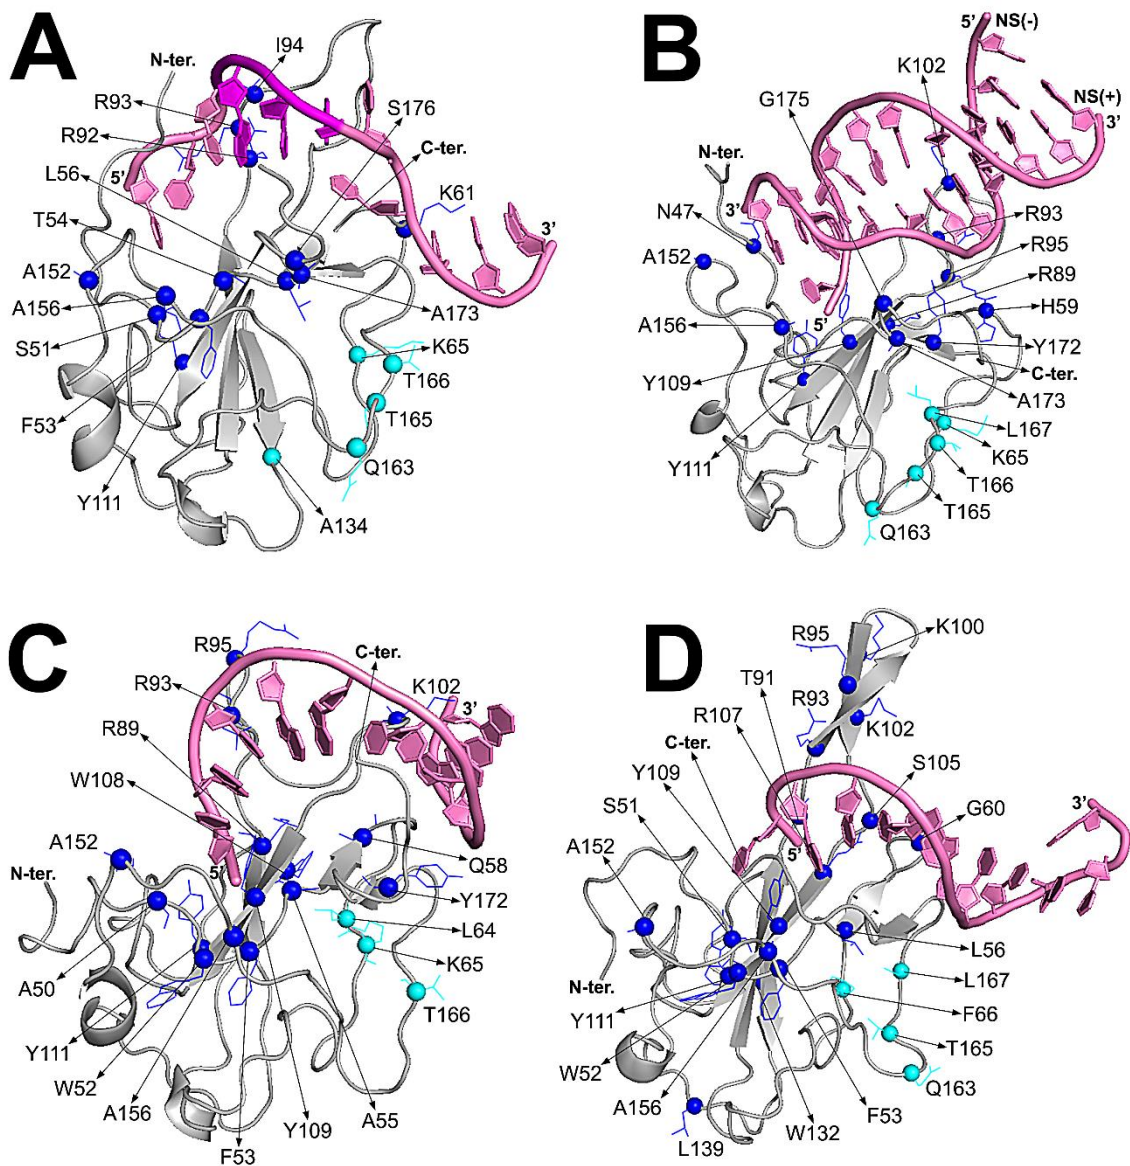

**Figure S11.** Representative structure models of the N-NTD complexed with (A) ssTRS(+), (B) dsNS, (C) ssNS(-), and (D) ssNS(+) obtained from the molecular docking and molecular dynamic simulations. The spheres denote the residues with CSP values higher than  $\Delta\delta_{ave} + SD$ , participating directly in the binding interface (blue) and in the remote region (cyan). The proteins are shown as a cartoon model, DNAs are represented as a cartoon-ring model, and the TTT motif in TRS is colored in magenta.

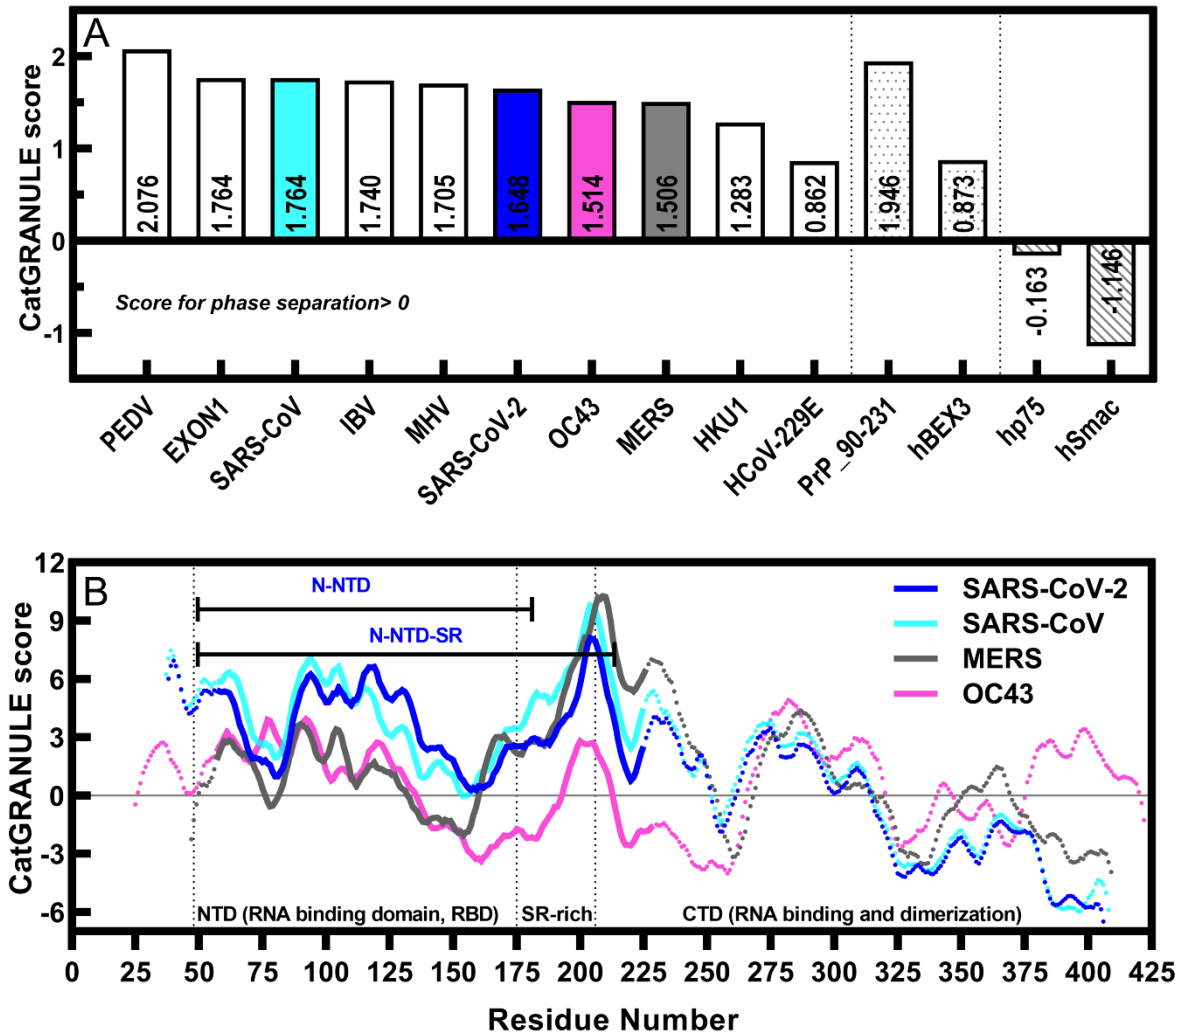

**Figure S12. The liquid-liquid phase separation of N-protein is predicted to be conversed between coronaviruses and the SR-rich region shows the highest propensity. (A)** Scores for liquid-liquid phase separation, based on catGRANULE algorithm [3] (score > 0 indicates granule formation; above 1.0 denotes strong propensity; available at [http://service.tartaglialab.com/new\\_submission/catGRANULE](http://service.tartaglialab.com/new_submission/catGRANULE)). Scores of N-protein from SARS-Cov-2 (Uniprot ID P0DTC9); SARS-CoV (P59595); MERS (R9UM87); OC43 (P33469); HCoV-229E (P15130); PEDV (Q07499); IBV (P69596); HKU1 (Q5MQC6); EXON1 (D2E1E2) were compared with controls. Positive controls composed by proteins that were experimentally proved to undergo *in vitro* liquid-liquid phase separation modulated by nucleic acids, such as the prion protein (PrP\_90-231; Uniprot ID P04925) [4] and Brain Expressed-X-linked 3 (BEX3; Uniprot ID Q00994) [5] represented by dotted bars. Negative controls composed by folded proteins such as hp75 (Uniprot ID P02768) and hSmac/Diablo (Uniprot ID Q9NR28) represented by stripped bars. Betacoronaviruses (colored bars) had phase separation propensity calculated along primary structure in (B) by catGRANULE. The dotted lines mark the domain organization of N-protein (1-48 is the IDR; 48-175 is the RBD; 176-206 is the SR-rich region followed by the C-terminus). The N-terminal constructs studied herein are highlighted in blue font. The SR-rich region, which is only present in the

N-NTD-SR construct, is likely to majorly contribute to N-protein liquid-liquid phase separation.

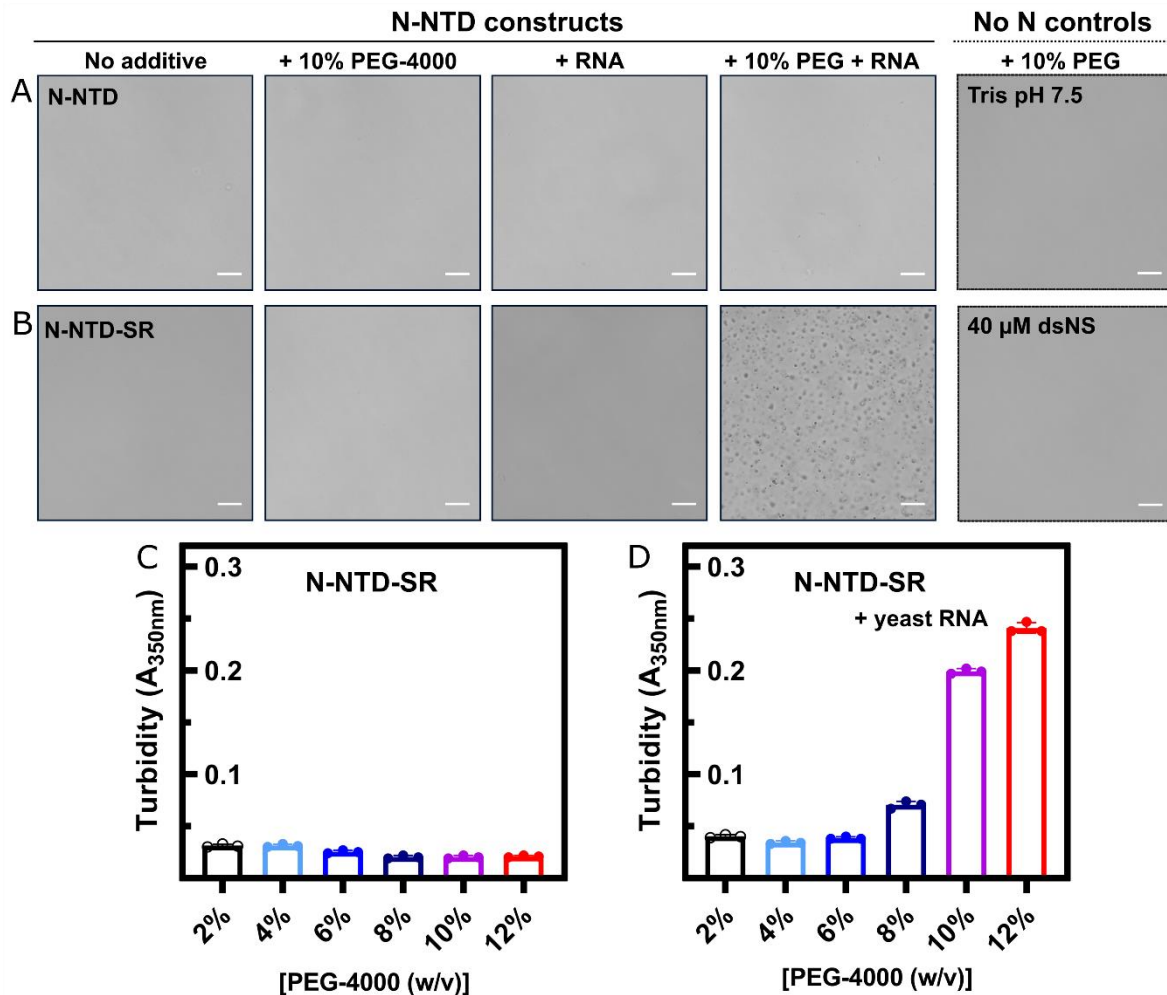

**Figure S13. The N-protein SR-rich region is important for N-NTD demixing with RNA.** Representative phase contrast micrographs of 20  $\mu$ M N-NTD (A) and 20  $\mu$ M N-NTD-SR (B) in 20 mM Tris-HCl buffer (pH 7.5) containing 30 mM NaCl. Left to right: only protein in buffer; protein in buffer containing the crowding agent 10% (w/v) PEG-4000; protein in buffer + Torula yeast RNA (1:2); protein in buffer + 10% (w/v) PEG-4000 + Torula yeast RNA (1:2). Controls are shown in dashed frames. Only vehicle consisting of buffer + 10% (w/v) PEG-4000. Only nucleic acid in the highest concentration used in the experiments (40  $\mu$ M ds22-bp). Phase separation of 20  $\mu$ M N-NTD-SR in 20 mM Tris-HCl buffer (pH 7.5) containing 30 mM NaCl monitored by absorbance measurements at 350 nm as a function of increasing concentrations of PEG-4000 (2% (black), 4% (light blue), 6% (marine blue), 8% (dark blue), 10% (purple), 12% (red)) in the absence (C) and presence (D) of Torula yeast RNA extract.

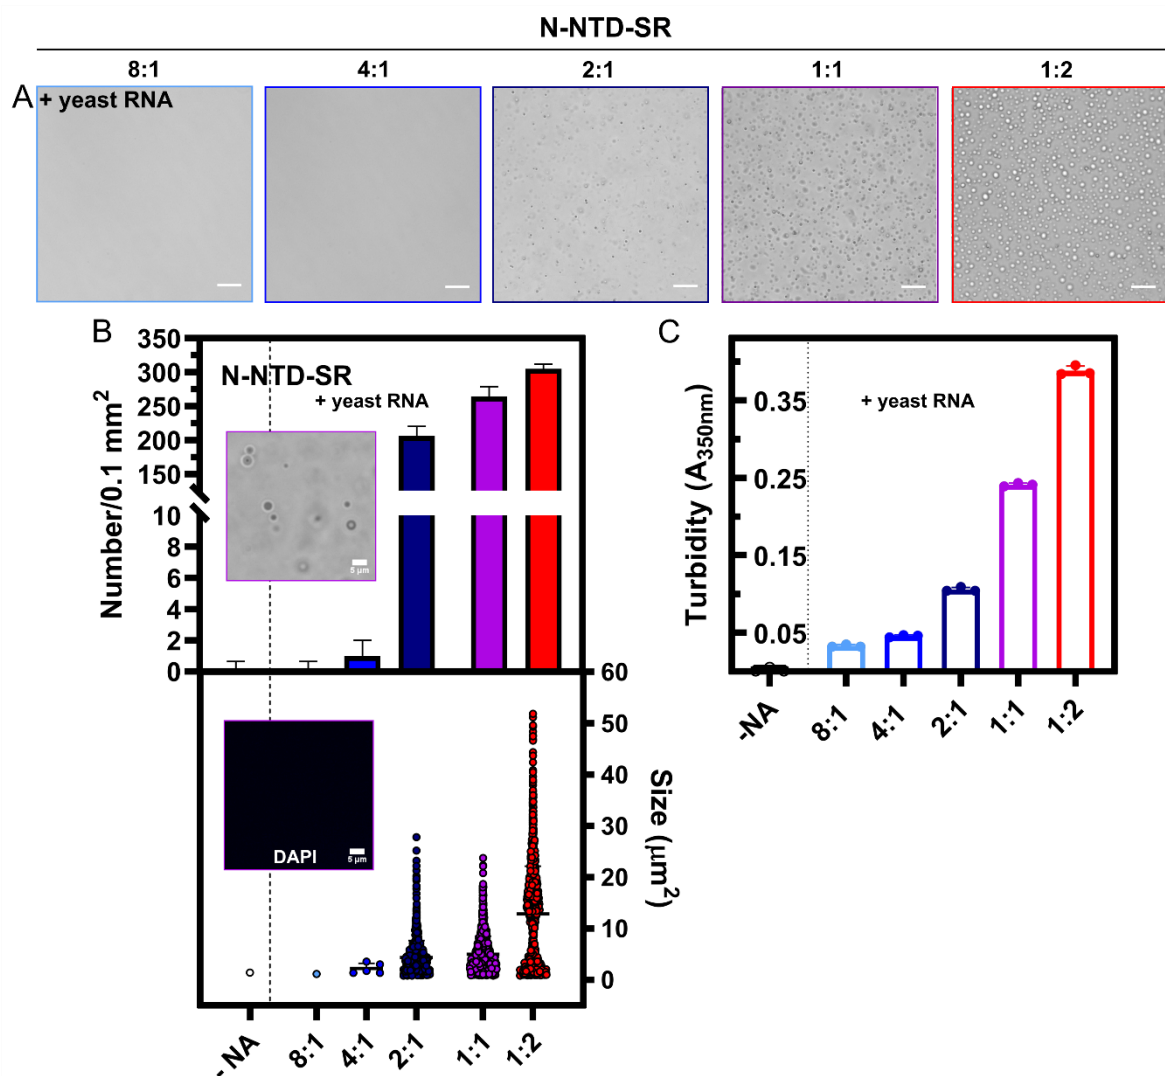

**Figure S14. Phase separation is promoted by increasing concentrations of yeast RNA.** LLPS assessment of 20  $\mu\text{M}$  N-NTD-SR in the presence of increasing *Torula* yeast RNA concentrations: 8:1 (light blue); 4:1 (marine blue); 2:1 (dark blue); 1:1 (purple); 1:2 (red) protein:RNA molar ratios, respectively, in 20 mM Tris-HCl buffer (pH 7.5) containing 30 mM NaCl. (A) Representative phase contrast micrographs. (B) Top graph: Mean number of condensates  $\pm$  S.D. per 100  $\mu\text{m}^2$  area ( $n=5$  images). Top inset: Phase contrast microscopy in the presence of DAPI for 1:1 protein:RNA stoichiometry. Bottom graph: Scatter plot from the size of condensates (represented as area in  $\mu\text{m}^2$ ) obtained from micrographs analysis. The following number of condensates had their size measured: 8:1 ( $N=1$ ); 4:1 ( $N=5$ ); 2:1 ( $N=1028$ ); 1:1 ( $N=1321$ ) and 1:2 ( $N=1753$ ). Bottom inset: corresponding DAPI emission (0.25  $\mu\text{g}/\text{mL}$ ) from the top graph inset image (no fluorescence observed). All conditions contained 10% (w/v) PEG-4000. Scale bar, 20  $\mu\text{m}$  apart from insets (5  $\mu\text{m}$ ). (C) Phase separation of 20  $\mu\text{M}$  N-NTD-SR in 20 mM Tris-HCl buffer (pH 7.5) containing 30 mM NaCl in the presence of 10% (w/v) PEG-4000 monitored by absorbance measurements at 350 nm as a function of increasing concentrations of *Torula* yeast RNA extract. The protein:RNA stoichiometries are the same as in (A).

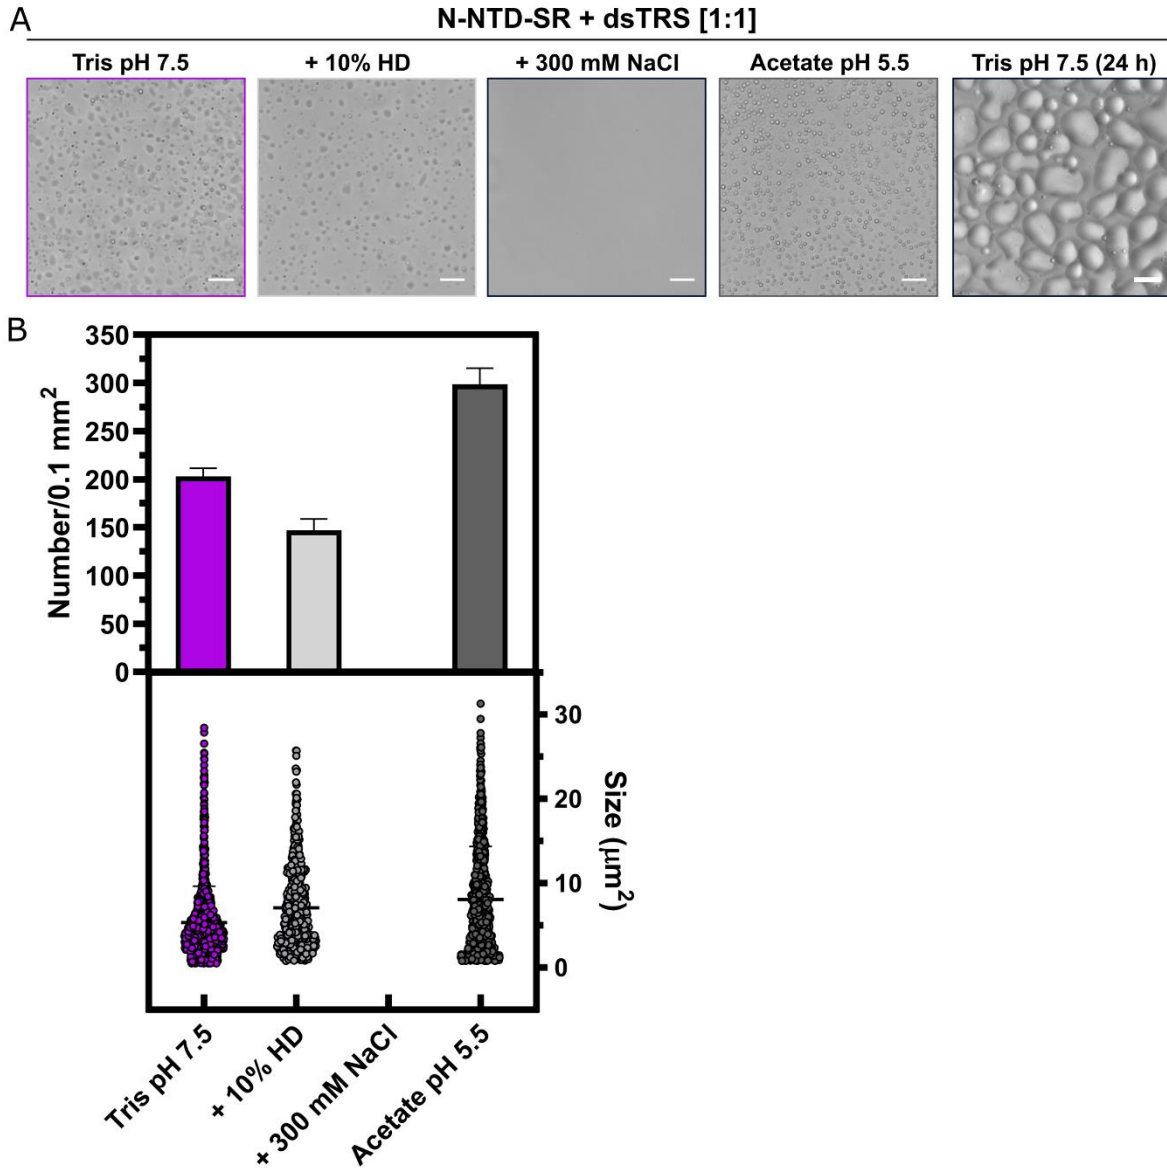

**Figure S15. N-NTD-SR:dsTRS liquid-liquid phase separation is driven by electrostatic contacts and promoted by acidic pH.** (A) Representative phase contrast micrographs from samples containing 20  $\mu\text{M}$  N-NTD-SR in the presence of 20  $\mu\text{M}$  dsTRS (1:1 molar ratio). Top left: sample in 20 mM Tris-HCl buffer (pH 7.5) containing 30 mM NaCl. Top right: with addition of 10% (w/v) 1,6-hexanediol (HD). Bottom left: with addition of 300 mM NaCl. Bottom right: sample in 20 mM sodium acetate buffer pH 5.5 with 30 mM NaCl. (B) Quantification of N-NTD-SR:dsTRS condensates in the presence of additives. Top graph: Mean number of condensates  $\pm$  S.D. per 100  $\mu\text{m}^2$  area ( $n=5$  images). Bottom graph: Scatter plot from condensates' size (represented as area in  $\mu\text{m}^2$ ) obtained from micrographs analysis. The following number of condensates' size were analyzed: sample in buffer (purple data,  $N=1013$ ); sample in buffer containing 10% HD (light gray data,  $N=598$ ); no condensates visualized in presence of 300 mM NaCl (absence of column,  $N=0$ ); sample in 20 mM sodium acetate pH 5.5, 30 mM NaCl (dark gray column,  $N=1174$ ). All conditions contained 10% (w/v) PEG-4000. Scale bar, 20  $\mu\text{m}$ .

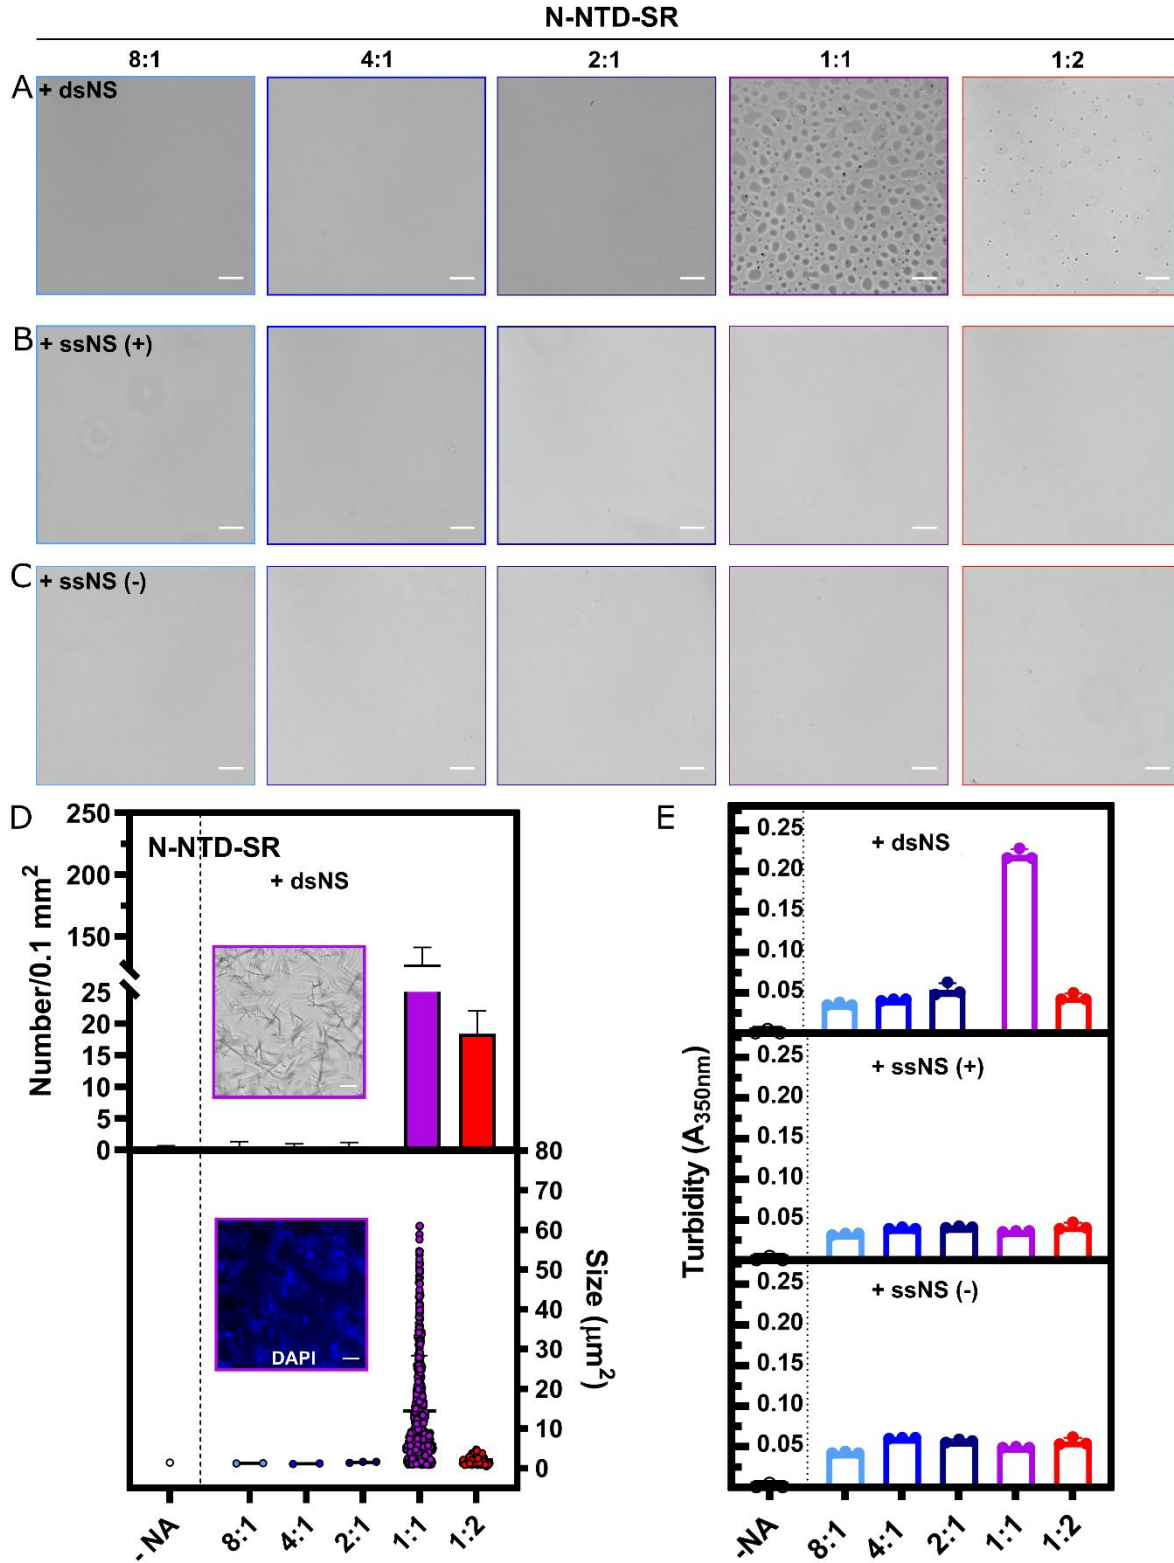

**Figure S16. The non-specific DNA oligonucleotide needs secondary structure to induce N-NTD-SR liquid-liquid phase separation.** Representative phase contrast micrographs of 20  $\mu\text{M}$  N-NTD-SR in the presence of dsNS (A); ssNS(+) (B) or ssNS(-) (C) at the following protein:DNA stoichiometries: 8:1 (light blue); 4:1 (marine blue); 2:1 (dark blue); 1:1

(purple); 1:2 (red), respectively, in 20 mM Tris-HCl buffer (pH 7.5) containing 30 mM NaCl. (D) Top graph: Mean number of condensates  $\pm$  S.D. per 100  $\mu\text{m}^2$  area ( $n=5$  images). Top inset: Phase contrast microscopy in the presence of DAPI for 1:1 N-NTD-SR:dsNS. Bottom graph: Scatter plot from the size of condensates (represented as area in  $\mu\text{m}^2$ ) obtained from micrographs analysis. Since no phase separation was observed for the single-stranded oligonucleotides, the following number of condensates' size were measured for the dsNS: - NA (1); at 8:1 (N= 2); 4:1 (N= 2); 2:1 (N= 3); 1:1 (N= 632) and 1:2 (N= 81). Bottom inset: corresponding DAPI emission from the top graph inset image acquired after 2 h incubation evidencing needle-like crystals formed by N-NTD-SR:dsNS at 1:1 stoichiometry. All conditions contained 10% (w/v) PEG-4000. Scale bar, 20  $\mu\text{m}$  including insets. (E) Phase separation of 20  $\mu\text{M}$  N-NTD-SR in 20 mM Tris-HCl buffer (pH 7.5) containing 30 mM NaCl in the presence of 10% (w/v) PEG-4000 monitored by absorbance measurements at 350 nm as a function of increasing concentrations of the non-specific DNA oligonucleotides dsNS (top graph), ssNS(+) (middle graph), and ssNS(-) (bottom graph). The protein:DNA stoichiometries are the same as in (A).

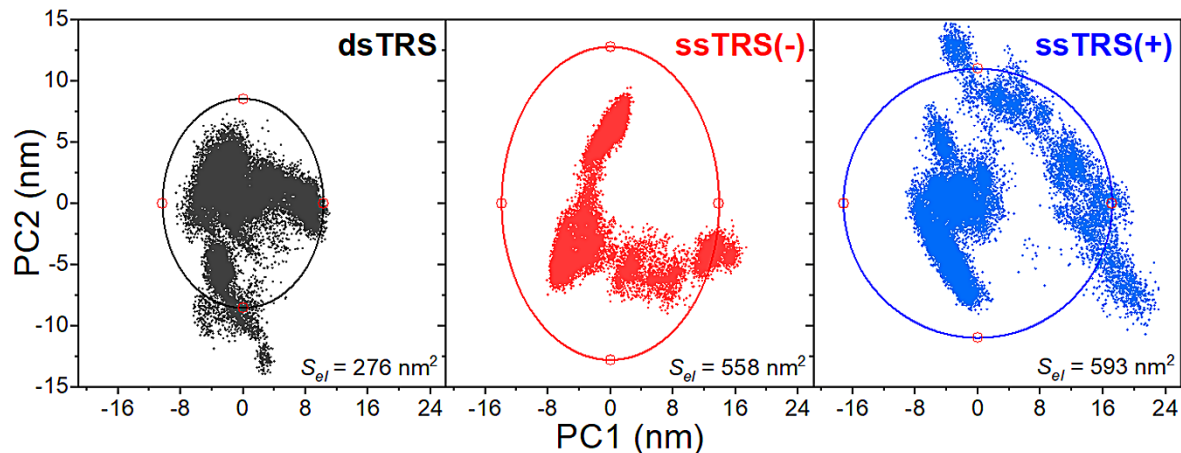

**Figure S17.** PCA scatter plots PC1 and PC2 for N-NTD complexed with dsTRS (black dots, *left*), ssTRS(-) (red dots, *middle*), and ssTRS(+) (blue dots, *right*). The extent of the conformational space for each scatter plot was measured by fitting an elliptical shell (solid lines) that contains 95% (confidence) of the density. The area of the ellipse ( $S_{el}$ ) is a measure of the conformational space for the free and bound protein. The N-NTD complexed with dsTRS explored a smaller conformational space along the 2  $\mu\text{s}$  MD simulation, meaning a more restricted motion of the protein, which may be a result of a better-defined position and orientation of the DNA duplex.

**Table S1.** Persistent hydrogen bonds (and salt bridges) between N-NTD and dsTRS predicted from the MD simulation.

| dsTRS  |            |          |               |                        |
|--------|------------|----------|---------------|------------------------|
| Donor  | Donor Atom | Acceptor | Acceptor atom | Persistence percentage |
| T1(+)  | O5'        | ASN48    | OD1           | 14.579                 |
| ASN48  | ND2        | T1(+)    | O4'           | 14.199                 |
| ARG88  | NH1        | C2(+)    | O2P           | 56.627                 |
| ASN48  | ND2        | C2(+)    | O1P           | 42.968                 |
| ARG88  | NH2        | C2(+)    | O2P           | 20.094                 |
| ARG88  | NH2        | C2(+)    | O1P           | 18.484                 |
| C2(+)  | N4         | GLU174   | OE2           | 15.709                 |
| C2(+)  | N4         | GLU174   | OE1           | 12.979                 |
| ASN47  | N          | C2(+)    | O1P           | 10.274                 |
| ARG107 | NH1        | T3(+)    | O4            | 49.028                 |
| ARG92  | NE         | T3(+)    | O2P           | 12.009                 |
| ARG107 | NH2        | T3(+)    | O4            | 10.324                 |
| ARG92  | NH2        | A4(+)    | O2P           | 10.174                 |
| ARG95  | NH1        | A5(+)    | O2P           | 11.854                 |
| GLY97  | N          | G4(-)    | O2P           | 31.763                 |
| LYS102 | NZ         | G4(-)    | O2P           | 26.994                 |
| LYS102 | NZ         | G4(-)    | O1P           | 18.974                 |
| LYS102 | NZ         | G4(-)    | N7            | 12.384                 |
| GLY97  | N          | G4(-)    | O1P           | 11.399                 |
| LYS61  | NZ         | G5(-)    | O2P           | 40.308                 |
| LYS102 | NZ         | G5(-)    | O6            | 11.439                 |
| GLY60  | N          | T6(-)    | O2P           | 32.713                 |
| GLY60  | N          | T6(-)    | O1P           | 30.848                 |
| SER105 | OG         | T6(-)    | O2P           | 22.159                 |
| HIS59  | NE2        | T7(-)    | O1P           | 38.308                 |
| ARG177 | NH2        | T7(-)    | O2P           | 22.799                 |
| TYR172 | OH         | T7(-)    | O2P           | 21.344                 |
| ARG177 | NH1        | T7(-)    | O1P           | 11.399                 |
| ARG177 | NE         | T7(-)    | O1P           | 10.509                 |
| ARG107 | NH2        | T8(-)    | O4            | 36.593                 |
| ARG177 | NH2        | T8(-)    | O2P           | 16.424                 |
| ARG177 | NH1        | T8(-)    | O2P           | 13.154                 |
| GLY178 | N          | T8(-)    | O2P           | 11.609                 |
| ARG177 | NE         | T8(-)    | O1P           | 11.309                 |
| A9(-)  | N6         | GLU174   | OE2           | 14.734                 |
| G9(-)  | N2         | ALA42    | O             | 16.694                 |

**Table S2.** Persistent hydrogen bonds (and salt bridges) between N-NTD and dsNS predicted from the MD simulation.

| dsNS   |            |          |               |                        |
|--------|------------|----------|---------------|------------------------|
| Donor  | Donor Atom | Acceptor | Acceptor atom | Persistence percentage |
| TYR111 | OH         | C1(+)    | O5'           | 87.506                 |
| ASN48  | ND2        | C1(+)    | O2            | 74.066                 |



|        |     |        |     |        |
|--------|-----|--------|-----|--------|
| ASN48  | ND2 | A2(+)  | O4' | 79.506 |
| A2(+)  | N6  | TYR109 | OH  | 46.253 |
| ARG88  | NH2 | A2(+)  | O1P | 44.448 |
| ARG88  | NH1 | A2(+)  | O1P | 40.648 |
| ARG88  | NH1 | A2(+)  | O2P | 34.933 |
| LEU45  | N   | A2(+)  | N3  | 27.964 |
| ASN47  | ND2 | A2(+)  | N3  | 17.499 |
| ARG92  | NH2 | C3(+)  | O2P | 19.569 |
| ARG92  | NH1 | C3(+)  | O2P | 16.679 |
| ARG92  | NE  | C3(+)  | O2P | 10.604 |
| ALA42  | N   | T4(+)  | O2  | 19.659 |
| LYS102 | N   | G4(-)  | O2P | 55.752 |
| LYS102 | NZ  | G4(-)  | N7  | 17.869 |
| ARG93  | NH2 | G5(-)  | O2P | 80.041 |
| ARG93  | NH1 | G5(-)  | O2P | 67.972 |
| LYS102 | NZ  | G5(-)  | O6  | 48.863 |
| MET101 | N   | G5(-)  | O2P | 44.918 |
| LYS100 | NZ  | G5(-)  | O1P | 22.094 |
| ARG93  | NH2 | G5(-)  | O5' | 21.444 |
| GLY99  | N   | G5(-)  | O1P | 17.599 |
| SER105 | OG  | T6(-)  | O2P | 47.303 |
| SER105 | N   | T6(-)  | O2P | 42.653 |
| ARG177 | NH2 | T6(-)  | O1P | 27.444 |
| ARG93  | NH1 | G5(-)  | O1P | 19.864 |
| ARG177 | NH1 | T6(-)  | O1P | 17.459 |
| LYS102 | NZ  | T6(-)  | O4  | 11.899 |
| ARG177 | NH1 | C7(-)  | O2P | 34.583 |
| SER105 | OG  | C7(-)  | N4  | 22.519 |
| ARG177 | NH2 | C7(-)  | O2P | 15.014 |
| TYR172 | OH  | C7(-)  | O2P | 10.309 |
| ARG107 | NH1 | G9(-)  | O6  | 55.462 |
| G9(-)  | N2  | ALA42  | O   | 34.598 |
| ARG107 | NH2 | G9(-)  | O6  | 17.359 |
| GLY44  | N   | T10(-) | O2  | 32.723 |
| G11(-) | N2  | LEU45  | O   | 36.778 |
| G11(-) | O3' | GLY44  | O   | 24.269 |
| G11(-) | N2  | ASN47  | OD1 | 21.884 |

**Table S3.** Persistent hydrogen bonds (and salt bridges) between N-NTD and ssTRS(-) predicted from the MD simulation.

| ssTRS(-) |            |          |               |                        |
|----------|------------|----------|---------------|------------------------|
| Donor    | Donor Atom | Acceptor | Acceptor atom | Persistence percentage |
| ASN47    | ND2        | C1       | O2            | 39.168                 |
| C1       | N4         | SER180   | OC2           | 37.868                 |
| C1       | N4         | SER180   | OC1           | 32.798                 |
| C1       | O5'        | THR49    | O             | 20.004                 |
| THR49    | OG1        | C1       | O5'           | 18.069                 |

|        |     |        |     |        |
|--------|-----|--------|-----|--------|
| TYR111 | OH  | C1     | O5' | 14.929 |
| TYR109 | OH  | G2     | O2P | 81.581 |
| ALA42  | N   | G2     | O1P | 34.533 |
| G2     | N1  | SER180 | OC2 | 24.599 |
| G2     | N1  | SER180 | OC1 | 22.829 |
| SER180 | OG  | G2     | N1  | 20.089 |
| G2     | N2  | ARG177 | O   | 19.794 |
| LEU45  | N   | G2     | O1P | 18.994 |
| G2     | N2  | SER180 | OC1 | 18.649 |
| G2     | N2  | SER180 | OC2 | 15.734 |
| G2     | N2  | GLY178 | O   | 12.084 |
| ARG149 | NH2 | G2     | O6  | 11.744 |
| ARG92  | NH2 | G2     | O2P | 11.049 |
| ARG107 | NH2 | C3     | O2P | 48.448 |
| ARG177 | N   | C3     | O4' | 31.698 |
| ARG107 | NH1 | C3     | O2P | 30.493 |
| ARG93  | NH2 | C3     | O1P | 25.624 |
| ARG177 | NE  | C3     | O2  | 17.514 |
| ARG177 | NH2 | C3     | O2P | 14.899 |
| ARG93  | NE  | C3     | O1P | 14.064 |
| ARG177 | NH1 | C3     | O5' | 13.159 |
| ARG95  | NH1 | G4     | O2P | 35.548 |
| ARG95  | NH2 | G4     | O2P | 33.258 |
| ARG93  | NH2 | G4     | O1P | 13.449 |
| ARG107 | NH2 | G4     | N7  | 11.914 |
| ARG93  | NH2 | G4     | O2P | 11.859 |
| ARG93  | NE  | G4     | O1P | 11.014 |
| ARG92  | NH2 | G5     | O6  | 31.083 |
| ARG95  | NE  | G5     | O2P | 30.638 |
| G5     | N1  | GLU174 | OE1 | 23.599 |
| G5     | N1  | GLU174 | OE2 | 23.094 |
| ARG92  | NH1 | G5     | O6  | 23.054 |
| G5     | N2  | GLU174 | OE1 | 20.434 |
| ARG95  | NH2 | G5     | O5' | 20.164 |
| G5     | N2  | GLU174 | OE2 | 19.564 |
| ARG95  | NH2 | G5     | O2P | 14.729 |
| SER105 | N   | T6     | O4  | 29.894 |
| SER105 | OG  | T6     | N3  | 17.864 |
| TYR172 | OH  | T6     | O2  | 10.819 |
| TYR172 | OH  | T7     | O2  | 34.293 |
| GLY170 | N   | A9     | O1P | 49.623 |
| LYS169 | NZ  | G10    | O1P | 47.848 |
| LYS61  | N   | A11    | N1  | 14.344 |

---

**Table S4.** Persistent hydrogen bonds (and salt bridges) between N-NTD and ssTRS(+) predicted from the MD simulation.

| ssTRS(+) |            |          |               |                        |
|----------|------------|----------|---------------|------------------------|
| Donor    | Donor Atom | Acceptor | Acceptor atom | Persistence percentage |
| GLY44    | N          | T1       | O3'           | 24.984                 |
| T1       | N3         | ASN153   | OD1           | 11.039                 |
| ARG107   | NH1        | C2       | O2            | 55.107                 |
| GLY44    | N          | C2       | O1P           | 49.063                 |
| ARG107   | NH2        | C2       | O2            | 46.193                 |
| ARG93    | N          | C2       | O3'           | 30.173                 |
| THR91    | N          | C2       | N3            | 17.054                 |
| ARG93    | NH1        | C2       | O2P           | 15.149                 |
| ARG93    | NH2        | C2       | O2P           | 11.189                 |
| ARG93    | NH2        | C2       | O1P           | 10.979                 |
| ARG92    | NE         | T3       | O2P           | 85.696                 |
| ILE94    | N          | T3       | O2P           | 80.171                 |
| ARG93    | N          | T3       | O2P           | 59.827                 |
| ARG92    | NH2        | T3       | O2P           | 53.822                 |
| ARG93    | NE         | T3       | O1P           | 39.638                 |
| ARG93    | NH2        | T3       | O1P           | 29.774                 |
| ARG92    | NH2        | T3       | O5'           | 25.129                 |
| MET43    | N          | T3       | O2            | 13.219                 |
| GLY41    | N          | T3       | O3'           | 11.714                 |
| ARG92    | NH1        | A4       | N7            | 20.259                 |
| GLY41    | N          | A4       | O1P           | 16.654                 |
| A4       | N6         | GLU174   | OE2           | 15.519                 |
| A4       | N6         | GLU174   | OE1           | 13.904                 |
| ARG92    | NH2        | A4       | O2P           | 10.359                 |
| ARG177   | NH2        | A6       | O3'           | 18.094                 |
| ARG177   | NH1        | C7       | O1P           | 26.609                 |
| ARG177   | NH2        | C7       | O1P           | 20.904                 |
| TYR172   | OH         | C7       | O2            | 10.769                 |
| HIS59    | NE2        | C8       | O2P           | 21.889                 |
| LYS61    | N          | G9       | O6            | 42.953                 |
| GLY170   | N          | G9       | O4'           | 33.788                 |
| HIS59    | NE2        | G9       | O5'           | 29.959                 |
| G9       | N1         | GLU62    | OE2           | 13.409                 |
| G9       | N2         | GLU62    | OE2           | 12.664                 |
| G9       | N2         | GLU62    | OE1           | 12.489                 |
| G9       | N1         | GLU62    | OE1           | 12.439                 |
| G9       | N2         | GLY60    | O             | 10.804                 |
| LYS169   | NZ         | C10      | O1P           | 36.403                 |
| GLY170   | N          | C10      | O1P           | 23.959                 |
| LYS169   | NZ         | G11      | O1P           | 16.139                 |

**Table S5.** Persistent hydrogen bonds (and salt bridges) between N-NTD and ssNS(-) predicted from the MD simulation.

| ssNS(-) |            |          |               |                        |
|---------|------------|----------|---------------|------------------------|
| Donor   | Donor Atom | Acceptor | Acceptor atom | Persistence percentage |
| C1      | O5'        | ASN154   | O             | 24.759                 |
| ASN154  | ND2        | C1       | O2            | 12.644                 |
| C1      | O5'        | PHE53    | O             | 11.774                 |
| TYR109  | OH         | G2       | O2P           | 45.728                 |
| THR91   | OG1        | G2       | O1P           | 18.169                 |
| THR91   | N          | G2       | O1P           | 14.094                 |
| ARG88   | NH1        | G2       | O1P           | 12.874                 |
| ARG93   | NH2        | C3       | O2P           | 30.998                 |
| ARG95   | NH2        | C3       | O1P           | 16.854                 |
| ARG93   | NH1        | C3       | O2P           | 13.529                 |
| ARG95   | NH1        | C3       | O1P           | 12.884                 |
| ARG93   | NE         | C3       | O2P           | 11.774                 |
| ARG107  | NH1        | G4       | O6            | 74.326                 |
| ARG107  | NH2        | G4       | O6            | 68.737                 |
| G4      | N2         | SER180   | OC1           | 42.148                 |
| ARG93   | NH2        | G4       | O2P           | 25.424                 |
| G4      | N1         | SER180   | OC1           | 20.654                 |
| ARG93   | NH1        | G4       | O2P           | 19.449                 |
| ARG93   | NH1        | G4       | N7            | 15.744                 |
| G4      | N2         | SER180   | OC2           | 13.974                 |
| ARG93   | NE         | G4       | O2P           | 13.334                 |
| G4      | N1         | SER180   | OC2           | 12.244                 |
| G5      | N2         | SER180   | OC2           | 64.952                 |
| G5      | N2         | SER180   | OC1           | 30.078                 |
| SER180  | N          | T6       | O2            | 80.641                 |
| SER180  | OG         | T6       | O4'           | 80.456                 |
| ARG177  | NH1        | T6       | O2            | 11.934                 |
| HIS59   | NE2        | C7       | O2            | 83.621                 |
| ARG177  | NH1        | C7       | O2            | 68.262                 |
| SER105  | OG         | C7       | N4            | 43.693                 |
| C7      | N4         | ASP103   | O             | 17.694                 |
| A8      | N6         | ASP103   | O             | 16.174                 |
| TYR172  | OH         | G9       | O1P           | 86.146                 |
| G9      | N2         | ASP103   | OD2           | 36.903                 |
| G9      | N2         | ASP103   | OD1           | 32.158                 |
| LYS61   | N          | T10      | O1P           | 50.137                 |
| LYS102  | NZ         | T10      | O2            | 17.034                 |
| LYS61   | NZ         | G11      | O1P           | 37.243                 |
| LYS61   | NZ         | G11      | O2P           | 30.938                 |
| ASP103  | N          | G11      | O3'           | 12.754                 |

**Table S6.** Persistent hydrogen bonds (and salt bridges) between N-NTD and ssNS(+) predicted from the MD simulation.

| ssNS(+) |            |          |               |                        |
|---------|------------|----------|---------------|------------------------|
| Donor   | Donor Atom | Acceptor | Acceptor atom | Persistence percentage |
| TYR111  | OH         | C1       | N4            | 55.397                 |
| C1      | N4         | ASN47    | O             | 48.013                 |
| TYR109  | OH         | C1       | O5'           | 38.443                 |
| C1      | N4         | THR49    | O             | 25.709                 |
| SER176  | OG         | A2       | N1            | 93.46                  |
| A2      | N6         | SER176   | O             | 92.245                 |
| ARG92   | NE         | A2       | O2P           | 24.794                 |
| ARG92   | NE         | A2       | O1P           | 20.869                 |
| ARG92   | NH1        | A2       | O2P           | 19.324                 |
| ARG92   | NH2        | A2       | O2P           | 17.249                 |
| ARG92   | NH2        | A2       | O1P           | 15.019                 |
| SER176  | OG         | A2       | N6            | 13.449                 |
| ARG92   | NH1        | A2       | O1P           | 11.304                 |
| C3      | N4         | GLU174   | OE2           | 48.983                 |
| C3      | N4         | GLU174   | OE1           | 45.353                 |
| ARG92   | NH1        | C3       | O2P           | 17.549                 |
| ARG92   | NH2        | C3       | O2P           | 15.644                 |
| ARG107  | NH2        | T4       | O4            | 43.378                 |
| TYR172  | OH         | G5       | N2            | 68.177                 |
| TYR172  | OH         | A6       | N3            | 50.672                 |
| GLY170  | N          | C8       | O1P           | 77.686                 |
| LYS169  | NZ         | G9       | O1P           | 47.033                 |

**Table S7.** Binding constants and thermodynamic parameters of the interaction of N-NTD and N-NTD-SR with different DNAs in 20 mM Bis-Tris pH 6.5. Data obtained from the fluorescence quenching experiments. The statistical significance between the observed means was tested using Pearson t student test with a significance of  $P < 0.05$  and 95 % confidence interval of the reported difference. The values compared are: ssTRS(+) & ssTRS(-) \*, ssNS(+) & ssNS(-) \*\*, ssTRS(+) & ssNS(+) \*\*\*, ssTRS(-) & ssNS(-) \*\*\*\*, and dsTRS & dsNS \*\*\*\*\*.

| Protein  | DNA      | T (°C)  | Kd (nM) | P < 0.05 | $\Delta H$ (kJ/mol) | $\Delta G$ (kJ/mol) | T· $\Delta S$ (kJ/mol) |
|----------|----------|---------|---------|----------|---------------------|---------------------|------------------------|
| N-NTD    | ssTRS(-) | 15      | 9 ± 4   | *        |                     | -44 ± 1             | 100 ± 2                |
|          |          | 25      | 4 ± 2   | *        | 56 ± 1              | -47 ± 1             | 103 ± 2                |
|          |          | 35      | 2 ± 1   |          |                     | -51 ± 1             | 107 ± 2                |
|          | ssTRS(+) | 15      | 45 ± 12 | *,***    |                     | -41 ± 1             | 103 ± 1                |
|          |          | 25      | 19 ± 7  | *        | 62 ± 1              | -44 ± 1             | 106 ± 1                |
|          |          | 35      | 8 ± 7   | ***      |                     | -48 ± 2             | 110 ± 2                |
|          | dsTRS    | 15      | 6 ± 2   | *****    |                     | -45 ± 1             | -15 ± 2                |
|          |          | 20      | 9 ± 3   | *****    | -60 ± 2             | -45 ± 1             | -15 ± 2                |
|          |          | 25      | 14 ± 4  | *****    |                     | -45 ± 1             | -15 ± 2                |
|          | ssNS(-)  | 15      | 16 ± 8  |          |                     | -43 ± 1             | 68 ± 1                 |
|          |          | 25      | 11 ± 10 |          | 25 ± 1              | -45 ± 2             | 70 ± 2                 |
|          |          | 35      | 8 ± 5   |          |                     | -48 ± 2             | 73 ± 2                 |
|          | ssNS(+)  | 15      | 17 ± 4  | ***      |                     | -43 ± 1             | 29 ± 2                 |
|          |          | 25      | 20 ± 4  |          | -14 ± 2             | -44 ± 1             | 30 ± 2                 |
|          |          | 35      | 25 ± 6  | **,***   |                     | -45 ± 1             | 31 ± 2                 |
| dsNS     | 15       | 30 ± 8  | *****   |          | -41 ± 1             | 1 ± 1               |                        |
|          | 20       | 40 ± 11 | *****   | -42 ± 1  | -41 ± 1             | 1 ± 1               |                        |
|          | 25       | 54 ± 12 | *****   |          | -41 ± 1             | 1 ± 1               |                        |
| N-NTD-SR | ssTRS(-) | 15      | 2 ± 1   | *,*****  |                     | -48 ± 1             | 109 ± 10               |
|          |          | 25      | 1 ± 2   | *,*****  | 61 ± 10             | -51 ± 5             | 112 ± 11               |
|          |          | 35      | 0.3 ± 1 | ****     |                     | -56 ± 8             | 117 ± 13               |
|          | ssTRS(+) | 15      | 31 ± 6  | *,***    |                     | -41 ± 1             | 87 ± 1                 |
|          |          | 25      | 16 ± 7  | *        | 46 ± 1              | -44 ± 1             | 90 ± 1                 |
|          |          | 35      | 9 ± 7   | ***      |                     | -47 ± 2             | 93 ± 2                 |
|          | dsTRS    | 15      | 5 ± 2   | *****    |                     | -46 ± 1             | -99 ± 1                |
|          |          | 20      | 14 ± 3  |          | -145 ± 1            | -44 ± 1             | -101 ± 1               |
|          |          | 25      | 38 ± 6  | *****    |                     | -42 ± 1             | -103 ± 1               |
|          | ssNS(-)  | 15      | 36 ± 13 | **,***** |                     | -41 ± 1             | 32 ± 1                 |
|          |          | 25      | 41 ± 6  | ****     | -9 ± 1              | -42 ± 1             | 33 ± 1                 |
|          |          | 35      | 46 ± 6  | **,***** |                     | -43 ± 1             | 34 ± 1                 |
|          | ssNS(+)  | 15      | 5 ± 4   | **,***   |                     | -46 ± 2             | -61 ± 2                |
|          |          | 25      | 24 ± 10 |          | -106 ± 2            | -43 ± 1             | -63 ± 2                |
|          |          | 35      | 94 ± 19 | **,***   |                     | -41 ± 1             | -65 ± 2                |
| dsNS     | 15       | 89 ± 16 | *****   |          | -39 ± 1             | 171 ± 1             |                        |
|          | 20       | 35 ± 14 |         | 132 ± 1  | -42 ± 1             | 174 ± 1             |                        |
|          | 25       | 14 ± 4  | *****   |          | -45 ± 1             | 177 ± 1             |                        |

**Table S8.** Affinity of interaction between N-NTD and DNAs estimated by CSP in 20 mM sodium phosphate buffer (pH 6.5) containing 50 mM NaCl. The statistical significance between the observed means was tested using Pearson t student test with a significance of  $P < 0.05$  and 95 % confidence interval of the reported difference. The values compared are: ssTRS(+) & ssTRS(-) \*, ssNS(+) & ssNS(-) \*\*, ssTRS(+) & ssNS(+) \*\*\*, and ssTRS(-) & ssNS(-) \*\*\*\*.

| Residue/Region                                                               | Kd ( $\mu\text{M}$ ) |               |             |               | P < 0.05    |
|------------------------------------------------------------------------------|----------------------|---------------|-------------|---------------|-------------|
|                                                                              | ssTRS(+)             | ssTRS(-)      | ssNS(+)     | ssNS(-)       |             |
| <b>N-terminal</b>                                                            |                      |               |             |               |             |
| N47                                                                          | 8 $\pm$ 12           | 4 $\pm$ 5     | 19 $\pm$ 11 | 5 $\pm$ 3     |             |
| N48                                                                          | 4 $\pm$ 3            | 3 $\pm$ 1     | 16 $\pm$ 6  | 6 $\pm$ 2     | **,***      |
| <b><math>\beta</math>-sheet II (<math>\beta</math>1/<math>\beta</math>5)</b> |                      |               |             |               |             |
| T54                                                                          | 1 $\pm$ 2            | 0.1 $\pm$ 0.8 | 11 $\pm$ 10 | 11 $\pm$ 7    | ****        |
| L56                                                                          | 4 $\pm$ 3            | 5 $\pm$ 5     | 22 $\pm$ 9  | 1 $\pm$ 4     | **,***      |
| <b>Remote region</b>                                                         |                      |               |             |               |             |
| D63                                                                          | 4 $\pm$ 5            | 2 $\pm$ 3     | 9 $\pm$ 8   | 2 $\pm$ 7     |             |
| K65                                                                          | 5 $\pm$ 2            | 1.1 $\pm$ 0.6 | 7 $\pm$ 2   | 4 $\pm$ 2     | *           |
| F66                                                                          | 7 $\pm$ 11           | 1 $\pm$ 2     | 6 $\pm$ 5   | 6 $\pm$ 7     |             |
| Q163                                                                         | 1 $\pm$ 2            | 3 $\pm$ 2     | 18 $\pm$ 6  | 12 $\pm$ 7    | ***         |
| T166                                                                         | 4 $\pm$ 1            | -             | 11 $\pm$ 2  | 6 $\pm$ 2     | **,***      |
| L167                                                                         | 5 $\pm$ 4            | 0.3 $\pm$ 0.6 | 21 $\pm$ 7  | 1 $\pm$ 1     | **,***      |
| <b>Finger</b>                                                                |                      |               |             |               |             |
| F90                                                                          | 13 $\pm$ 7           | 7 $\pm$ 5     | 18 $\pm$ 13 | 1 $\pm$ 2     |             |
| R95                                                                          | 1 $\pm$ 4            | 0.1 $\pm$ 0.5 | 1 $\pm$ 2   | 4 $\pm$ 3     |             |
| G96                                                                          | 3 $\pm$ 9            | 1 $\pm$ 5     | 24 $\pm$ 18 | 5 $\pm$ 6     |             |
| K102                                                                         | 1 $\pm$ 3            | -             | 21 $\pm$ 11 | 3 $\pm$ 2     | **,***      |
| <b>Palm (<math>\beta</math>2/<math>\beta</math>3/<math>\beta</math>4)</b>    |                      |               |             |               |             |
| Y111                                                                         | 2 $\pm$ 2            | 0.4 $\pm$ 0.5 | 1 $\pm$ 1   | 2.3 $\pm$ 0.9 | ****        |
| <b>Thumb</b>                                                                 |                      |               |             |               |             |
| A152                                                                         | 0.7 $\pm$ 0.7        | 0.4 $\pm$ 0.4 | 8 $\pm$ 3   | 2.5 $\pm$ 0.6 | **,***,**** |
| <b>C-terminal</b>                                                            |                      |               |             |               |             |
| S176                                                                         | 3 $\pm$ 2            | 1 $\pm$ 5     | 6 $\pm$ 7   | 1 $\pm$ 3     |             |
| G178                                                                         | 2 $\pm$ 2            | 0.1 $\pm$ 0.5 | 5 $\pm$ 4   | 9 $\pm$ 12    |             |
| G179                                                                         | 2 $\pm$ 4            | 2 $\pm$ 5     | 3 $\pm$ 5   | 2 $\pm$ 5     |             |
| <b>All regions</b>                                                           |                      |               |             |               |             |
| <b>Average</b>                                                               | 4 $\pm$ 3            | 2 $\pm$ 2     | 12 $\pm$ 7  | 4 $\pm$ 3     |             |

## REFERENCES

- [1] D.C. Dinesh, D. Chalupska, J. Silhan, E. Koutna, R. Nencka, V. Veverka, E. Boura, Structural basis of RNA recognition by the SARS-CoV-2 nucleocapsid phosphoprotein., *PLoS Pathog.* 16 (2020) e1009100. <https://doi.org/10.1371/journal.ppat.1009100>.
- [2] M.A. Larkin, G. Blackshields, N.P. Brown, R. Chenna, P.A. Mcgettigan, H. McWilliam, F. Valentin, I.M. Wallace, A. Wilm, R. Lopez, J.D. Thompson, T.J. Gibson, D.G. Higgins, Clustal W and Clustal X version 2.0, *Bioinformatics.* 23 (2007) 2947–2948.

<https://doi.org/10.1093/bioinformatics/btm404>.

- [3] B. Bolognesi, N.L. Gotor, R. Dhar, D. Cirillo, M. Baldrighi, G.G. Tartaglia, B. Lehner, A concentration-dependent liquid phase separation can cause toxicity upon increased protein expression, *Cell Rep.* 16 (2016) 222–231. <https://doi.org/10.1016/j.celrep.2016.05.076>.
- [4] C.O. Matos, Y.M. Passos, M.J. do Amaral, B. Macedo, M.H. Tempone, O.C.L. Bezerra, M.O. Moraes, M.S. Almeida, G. Weber, S. Missailidis, J.L. Silva, V.N. Uversky, A.S. Pinheiro, Y. Cordeiro, Liquid-liquid phase separation and fibrillation of the prion protein modulated by a high-affinity DNA aptamer, *FASEB J.* 34 (2020) 365–385. <https://doi.org/10.1096/fj.201901897R>.
- [5] M.J. do Amaral, T.S. Araujo, N.C. Díaz, F. Accornero, C.R. Polycarpo, Y. Cordeiro, K.M.S. Cabral, M.S. Almeida, Phase Separation and Disorder-to-Order Transition of Human Brain Expressed X-Linked 3 (hBEX3) in the Presence of Small Fragments of tRNA, *J. Mol. Biol.* 432 (2020) 2319–2348. <https://doi.org/10.1016/j.jmb.2020.02.030>.
